# Supplementary material
Source: PubMed Central journal article supplement (PMC3836402)
Supplement: NIHMS53526-supplement-1.pdf [file NIHMS53526-supplement-1.pdf]

**Supplementary Table 1. Differentially expressed genes common to *Grlb3<sup>ct</sup>/J* curly tail (CT), RD1 and *VLDLR<sup>-/-</sup>* (VLDLR) mouse, ranked according to the total fold change.**

| Probe ID<br>(mouse 430 2.0) | Gene symbol   | Gene name                                                                    | Fold<br>change<br>CT | Adj.P.Val<br>CT | Fold<br>change<br>RD1 | Adj.P.Val<br>RD1 | Fold<br>change<br>VLDLR | Adj.P.Val<br>VLDLR |
|-----------------------------|---------------|------------------------------------------------------------------------------|----------------------|-----------------|-----------------------|------------------|-------------------------|--------------------|
| 1417290_at                  | Lrg1          | leucine-rich alpha-2-glycoprotein 1                                          | 91.7636              | 2.9E-03         | 14.0924               | 2.0E-02          | 54.869                  | 8.9E-03            |
| 1418090_at                  | Pvap          | plasmalemma vesicle associated protein                                       | 26.6803              | 1.7E-04         | 4.04288               | 1.0E-02          | 16.1691                 | 2.4E-04            |
| 1448550_at                  | Lbp           | lipopolysaccharide binding protein                                           | 8.30723              | 1.0E-02         | 12.9304               | 2.2E-03          | 14.1926                 | 4.4E-03            |
| 1438651_a_at                | Aplnr         | apelin receptor                                                              | 8.3123               | 8.6E-04         | 8.91962               | 4.0E-04          | 10.7802                 | 1.4E-04            |
| 1428909_at                  | A130040M12Rik | RIKEN cDNA A130040M12 gene                                                   | 9.92697              | 1.5E-03         | 6.27517               | 2.5E-03          | 4.32157                 | 2.9E-02            |
| 1417314_at                  | Cfb           | complement factor B                                                          | 6.26419              | 5.4E-03         | 3.70837               | 1.4E-02          | 4.7483                  | 2.5E-02            |
| 1455396_at                  | Atp8b1        | ATPase, class I, type 8B, member 1                                           | 4.06571              | 3.4E-02         | 4.83276               | 1.1E-02          | 4.81082                 | 4.8E-02            |
| 1421813_a_at                | Psap          | prosaposin                                                                   | 6.34634              | 4.3E-05         | 2.39414               | 3.0E-03          | 2.42442                 | 8.5E-03            |
| 1424374_at                  | Gimap4        | GTPase, IMAP family member 4                                                 | 2.85718              | 6.1E-03         | 3.17947               | 2.1E-03          | 3.12492                 | 6.0E-03            |
| 1429117_at                  | Tradd         | TNFRSF1A-associated via death domain                                         | 2.16031              | 1.0E-02         | 2.70536               | 1.7E-03          | 2.09701                 | 2.7E-02            |
| 1437937_at                  | Ccbp2         | chemokine binding protein 2                                                  | 2.77401              | 3.2E-03         | 1.99412               | 1.1E-02          | 2.12383                 | 3.0E-02            |
| 1418133_at                  | Bcl3          | B-cell leukemia/lymphoma 3                                                   | 2.70012              | 2.9E-03         | 1.65497               | 3.6E-02          | 2.25292                 | 1.5E-02            |
| 1423082_at                  | Derf1         | Der1-like domain family, member 1                                            | 2.63764              | 1.5E-03         | 1.80582               | 8.7E-03          | 1.78428                 | 4.1E-02            |
| 1420886_a_at                | Xbp1          | X-box binding protein 1                                                      | 2.03224              | 2.4E-03         | 2.01532               | 1.6E-03          | 1.91993                 | 5.5E-03            |
| 1422470_at                  | Bnip3         | BCL2/adenovirus E1B interacting protein 3                                    | 1.61685              | 3.5E-02         | 2.1982                | 1.9E-03          | 1.97173                 | 1.3E-02            |
| 1451486_at                  | Slc46a3       | solute carrier family 46, member 3                                           | 2.09355              | 9.5E-03         | 1.72516               | 1.9E-02          | 1.91872                 | 3.7E-02            |
| 1431146_a_at                | Cpne8         | copine VIII                                                                  | 1.71393              | 2.2E-02         | 1.76654               | 9.1E-03          | 2.12126                 | 7.1E-03            |
| 1451160_s_at                | Pvr           | poliovirus receptor                                                          | 1.63952              | 4.0E-02         | 1.81735               | 9.5E-03          | 2.07993                 | 1.2E-02            |
| 1433954_at                  | 4632419I22Rik | RIKEN cDNA 4632419I22 gene                                                   | 1.66072              | 2.7E-02         | 1.8004                | 7.2E-03          | 1.71569                 | 4.8E-02            |
| 1418621_at                  | Rab2a         | RAB2A, member RAS oncogene family                                            | 1.53365              | 9.3E-03         | 1.8329                | 9.5E-04          | 1.63074                 | 7.2E-03            |
| 1420475_at                  | Mtpn          | myotrophin                                                                   | 1.63782              | 6.6E-03         | 1.63484               | 3.5E-03          | 1.63386                 | 1.2E-02            |
| 1432271_a_at                | Dcun1d5       | DCN1, defective in cullin neddylation 1, domain containing 5 (S. cerevisiae) | 1.38274              | 3.9E-02         | 1.69433               | 2.3E-03          | 1.53182                 | 2.4E-02            |
| 1428090_at                  | Ptcd3         | pentatricopeptide repeat domain 3                                            | 1.45038              | 1.1E-02         | 1.53833               | 2.9E-03          | 1.42394                 | 2.9E-02            |
| 1418437_a_at                | Mlx           | MAX-like protein X                                                           | 1.31619              | 4.4E-02         | 1.69152               | 1.3E-03          | 1.38383                 | 5.0E-02            |
| 1419104_at                  | Abhd6         | abhydrolase domain containing 6                                              | 1.53807              | 3.5E-03         | 1.35695               | 1.0E-02          | 1.41002                 | 2.3E-02            |
| 1460585_x_at                | Pisd          | phosphatidylserine decarboxylase                                             | 1.38932              | 1.3E-02         | 1.35054               | 1.1E-02          | 1.45259                 | 1.3E-02            |
| 1441593_at                  | ---           | ---                                                                          | -5.8006              | 1.5E-02         | -20.557               | 6.7E-04          | -9.2821                 | 8.1E-03            |
| 1420511_at                  | Ppfp2         | peripherin 2                                                                 | -10.884              | 2.5E-02         | -11.855               | 1.1E-02          | -11.918                 | 4.8E-02            |
| 1444552_at                  | ---           | ---                                                                          | -10.679              | 2.1E-04         | -17.453               | 6.6E-05          | -5.9313                 | 1.1E-03            |
| 1441789_at                  | ---           | ---                                                                          | -8.173               | 1.9E-03         | -14.935               | 2.9E-04          | -5.5579                 | 8.7E-03            |
| 1440068_at                  | ---           | ---                                                                          | -5.2199              | 9.4E-04         | -2.2646               | 1.6E-02          | -8.3788                 | 5.2E-05            |
| 1446616_at                  | ---           | ---                                                                          | -3.3061              | 6.6E-03         | -6.987                | 3.0E-04          | -3.829                  | 5.5E-03            |
| 1441671_at                  | ---           | ---                                                                          | -3.4247              | 9.4E-04         | -4.639                | 1.8E-04          | -4.8477                 | 5.3E-05            |

Supplementary Table 1 (continued)

| Probe ID<br>(mouse 430 2.0) | Gene symbol                | Gene name                                                                                    | Fold<br>change<br>CT | Adj.P.Val<br>CT | Fold<br>change<br>RD1 | Adj.P.Val<br>RD1 | Fold<br>change<br>VLDLR | Adj.P.Val<br>VLDLR |
|-----------------------------|----------------------------|----------------------------------------------------------------------------------------------|----------------------|-----------------|-----------------------|------------------|-------------------------|--------------------|
| 1445746_at                  | Eif4h                      | Eukaryotic translation initiation factor 4H,<br>mRNA (cDNA clone MGC:11689<br>IMAGE:3962104) | -3.8752              | 1.9E-03         | -4.5091               | 6.7E-04          | -4.4588                 | 7.4E-04            |
| 1458068_at                  | ---                        | ---                                                                                          | -3.4222              | 1.1E-02         | -4.9557               | 1.7E-03          | -3.0991                 | 3.7E-02            |
| 1447024_at                  | ---                        | ---                                                                                          | -3.5262              | 5.0E-03         | -4.103                | 1.6E-03          | -3.7124                 | 6.5E-03            |
| 1457477_at                  | Mbnl2                      | muscleblind-like 2                                                                           | -2.4561              | 3.9E-02         | -5.9534               | 9.0E-04          | -2.9218                 | 4.1E-02            |
| 1459687_x_at                | ---                        | ---                                                                                          | -2.6253              | 3.2E-02         | -5.014                | 1.6E-03          | -3.0497                 | 3.7E-02            |
| 1442548_at                  | ---                        | ---                                                                                          | -3.1449              | 1.2E-02         | -3.8378               | 3.0E-03          | -3.3423                 | 1.9E-02            |
| 1436892_at                  | Spred2                     | sprouty-related, EVH1 domain containing 2                                                    | -2.9503              | 2.4E-03         | -4.7226               | 1.8E-04          | -2.6117                 | 6.8E-03            |
| 1460567_at                  | Rfx7                       | regulatory factor X, 7                                                                       | -2.8183              | 5.5E-03         | -3.5444               | 1.3E-03          | -3.8806                 | 1.1E-03            |
| 1442278_at                  | Kdm5b                      | Jumonji, AT rich interactive domain 1B (Rbp2<br>like) (Jairid1b), mRNA                       | -3.0173              | 1.8E-02         | -4.1552               | 3.0E-03          | -3.0153                 | 4.1E-02            |
| 1429113_at                  | 2900092E17Rik<br>/// Prrt2 | RIKEN cDNA 2900092E17 gene /// proline-<br>rich transmembrane protein 2                      | -3.3018              | 2.6E-02         | -3.1771               | 1.6E-02          | -3.5922                 | 4.4E-02            |
| 1442411_at                  | ---                        | ---                                                                                          | -3.1871              | 6.6E-03         | -3.2468               | 3.2E-03          | -2.5439                 | 4.1E-02            |
| 1442735_at                  | ---                        | ---                                                                                          | -2.7302              | 2.0E-02         | -3.1033               | 6.0E-03          | -2.7454                 | 4.6E-02            |
| 1437965_at                  | Heatr1                     | HEAT repeat containing 1                                                                     | -2.1302              | 3.1E-02         | -3.8366               | 1.2E-03          | -2.5485                 | 2.5E-02            |
| 1458798_at                  | ---                        | ---                                                                                          | -2.8396              | 2.1E-04         | -2.7643               | 1.8E-04          | -2.2725                 | 7.4E-04            |
| 1444599_at                  | Herc4                      | hect domain and RLD 4                                                                        | -3.2621              | 9.4E-04         | -2.1305               | 4.6E-03          | -2.3084                 | 8.6E-03            |
| 1440755_at                  | ---                        | ---                                                                                          | -2.1872              | 1.1E-02         | -2.8937               | 1.6E-03          | -2.1518                 | 2.7E-02            |
| 1446954_at                  | ---                        | ---                                                                                          | -2.1791              | 8.6E-04         | -2.5859               | 1.8E-04          | -2.4363                 | 1.1E-04            |
| 1435984_at                  | Zfp40                      | Zinc finger protein 40 (Zfp40), mRNA                                                         | -2.0125              | 1.4E-02         | -1.7045               | 2.6E-02          | -3.0637                 | 1.1E-03            |
| 1426287_at                  | Atxn7                      | ataxin 7                                                                                     | -1.8399              | 1.0E-02         | -2.1381               | 2.0E-03          | -1.9469                 | 1.2E-02            |
| 1419236_at                  | Helb                       | helicase (DNA) B                                                                             | -1.6318              | 1.2E-02         | -2.4282               | 3.8E-04          | -1.7659                 | 1.1E-02            |
| 1428996_at                  | 4833426J09Rik              | RIKEN cDNA 4833426J09 gene                                                                   | -1.823               | 3.2E-02         | -1.6059               | 4.7E-02          | -2.361                  | 1.0E-02            |
| 1432978_at                  | 9030607L02Rik              | RIKEN cDNA 9030607L02 gene                                                                   | -2.0972              | 3.5E-03         | -1.8484               | 4.8E-03          | -1.823                  | 2.2E-02            |
| 1442071_at                  | Abce1                      | ATP-binding cassette, sub-family E (OABP),<br>member 1                                       | -1.7106              | 1.4E-02         | -2.3357               | 9.3E-04          | -1.6402                 | 4.9E-02            |
| 1445438_at                  | Ddhd1                      | DDHD domain containing 1                                                                     | -1.7985              | 6.8E-03         | -2.1305               | 1.2E-03          | -1.6959                 | 2.3E-02            |
| 1445436_at                  | BC059842                   | PREDICTED: Mus musculus cDNA sequence<br>BC059842 (BC059842), mRNA                           | -2.0196              | 1.8E-03         | -1.9107               | 1.6E-03          | -1.6305                 | 2.3E-02            |
| 1455611_at                  | Pias1                      | protein inhibitor of activated STAT 1                                                        | -1.8771              | 1.8E-03         | -1.453                | 1.2E-02          | -1.6163                 | 1.3E-02            |
| 1440331_at                  | Kdsr                       | 3-ketodihydroshingosine reductase                                                            | -1.6376              | 3.1E-03         | -1.4473               | 6.7E-03          | -1.4862                 | 1.9E-02            |
| 1442443_at                  | ---                        | ---                                                                                          | -1.4444              | 2.4E-02         | -1.5212               | 6.7E-03          | -1.5421                 | 2.3E-02            |
| 1437919_at                  | Bdp1                       | B double prime 1, subunit of RNA polymerase<br>III transcription initiation factor IIIB      | -1.4457              | 1.1E-02         | -1.495                | 3.7E-03          | -1.3805                 | 4.7E-02            |

**Supplementary Table 2. Primer sequences.**

| Application                     | Primer name                                                   | Primer sequence              |                                                                                                                                 |
|---------------------------------|---------------------------------------------------------------|------------------------------|---------------------------------------------------------------------------------------------------------------------------------|
| <b>Quantitative PCR primers</b> | mLrg1_For                                                     | CCATGTCAGTGTGCAGATTC         |                                                                                                                                 |
|                                 | mLrg1_Rev                                                     | AAGAGTGAGAGGTGGAAAGAG        |                                                                                                                                 |
|                                 | mTGFβ1_For                                                    | TTGCTTCAGCTCCACAGAGA         |                                                                                                                                 |
|                                 | mTGFβ1_Rev                                                    | TGGTTGTAGAGGGCAAGGAC         |                                                                                                                                 |
|                                 | PAI1_For                                                      | CCTCTCCACAAGTCTGATGGC        |                                                                                                                                 |
|                                 | PAI1_Rev                                                      | GCAGTCCACAACGTCATACTCG       |                                                                                                                                 |
|                                 | ID1_For                                                       | TGAACGGCGAGATCAGTGCCTT       |                                                                                                                                 |
|                                 | ID1_Rev                                                       | GTGGCTGCGGTAGTGTCTTTTC       |                                                                                                                                 |
|                                 | mVEGF_For                                                     | GACTTGTGTTGGGAGGAGGA         |                                                                                                                                 |
|                                 | mVEGF_Rev                                                     | TCTGGAAGTGAGCCCAATGTG        |                                                                                                                                 |
|                                 | mAplin_For                                                    | GGCCTTCTCCGCTTTTGTCC         |                                                                                                                                 |
|                                 | mAplin_Rev                                                    | CCCTCTTGCTCTCTATCTCTCC       |                                                                                                                                 |
|                                 | mAPLNR_For                                                    | GGGAGTAAGTTTGGGAAAGAG        |                                                                                                                                 |
|                                 | mAPLNR_Rev                                                    | TGGAATATGTCTTGTCCCTTGG       |                                                                                                                                 |
|                                 | mPIGF_For                                                     | TTCTCAGGATGTGCTCTGTGAA       |                                                                                                                                 |
| mPIGF_Rev                       | CTGGTTACCTCCGGGAAATGAC                                        |                              |                                                                                                                                 |
| <b>Genotyping primers</b>       | GAPDH_For                                                     | ACTGAGGACCAGGTTGTCTCC        |                                                                                                                                 |
|                                 | GAPDH_Rev                                                     | CTGTAGCCGTATTCATTGTCATACC    |                                                                                                                                 |
|                                 | TUF                                                           | TGCACCTCTCGAGCAATCG          |                                                                                                                                 |
|                                 | TUR                                                           | AGAGCATTGCGGGTCAGATC         |                                                                                                                                 |
|                                 | NeoFwd                                                        | TCATTCTCAGTATTGTTTTGGCC      |                                                                                                                                 |
|                                 | SD                                                            | GACCCCTGAAACACAGACGTG        |                                                                                                                                 |
|                                 | SU                                                            | TCCTGGTGGGAGGGACTC           |                                                                                                                                 |
|                                 | LaclnZRev                                                     | GTCTGTCCTAGCTTCTCACTG        |                                                                                                                                 |
|                                 | <b>Primers for cloning rhLrg1</b>                             | Lrg1-His_For                 | GTGTAAGCTTGGCCACCATGGCCATGTCCTCTTGGAGCAGAC                                                                                      |
|                                 |                                                               | Lrg1-His_Rev                 | GTGTCTCGAGTCATCACTAGTAGTAGTATGATGGTGTGCTGGGACTTGGCCACTGCCA                                                                      |
|                                 | <b>Primers for cloning Lrg1-HA</b>                            | HLRG1For                     | GTGTAAGCTTGGCCACCATGGCCATGTCCTCTTGGAGCAGAC                                                                                      |
|                                 |                                                               | HLRG1Rev                     | GTGTCTCGAGCTGGGACTTGGCCACTGCCA                                                                                                  |
|                                 | <b>Primers for generating RNA in situ hybridisation probe</b> | nucleotide sequence for 3XHA | GTGTCTCGAGGAGTACCCCATACGACGTACCCAGATTACGCTTACCCATA<br>CGATGTTCCAGATTACCGCTTATCCCATATGACGTCCACGACTATGCCCTAG<br>TGATAACTCGAGGGTGT |
|                                 |                                                               | mLrg1_insitu_For             | CTGGTCGCCAACCCGAAACAAGA                                                                                                         |
|                                 |                                                               | mLrg1_insitu_Rev             | AGTCAGCCTAGGAGCCGTTTT                                                                                                           |

**Supplementary Table 2. Primer sequences  
(continued).**

| Application                                                                              | Primer name       | Primer sequence                                                                  |
|------------------------------------------------------------------------------------------|-------------------|----------------------------------------------------------------------------------|
| <b>Primers for constructing TGF<math>\beta</math><br/>Receptors extracellular domain</b> | ALK1_For          | GTGTAAGCTTGCCACCATGGCCATGACCT TGGGCTCCCC                                         |
|                                                                                          | ALK1_Rev          | GTGTGAATTCCTGGCCATCTGTCCCGGCT                                                    |
|                                                                                          | ALK5_For          | GTGTAAGCTTGCCACCATGGCCATGGAGCGCGGTCGCT                                           |
|                                                                                          | ALK5_Rev          | GTGTGAATTCAGTCCACAGGACCAAGGCC                                                    |
|                                                                                          | T $\beta$ RII_For | GTGTAAGCTTGCCACCATGGCCATGGGTCCGGGGGCTGCT                                         |
|                                                                                          | T $\beta$ RII_Rev | GTGTGAATTCCTATCACTACAGGTCCTCCTCTGAGATCAGCTTCTGCTCTTCTGAGAAGATGATGTTGTCATTG       |
| <b>Primers for cloning GST-ENG</b>                                                       | ENG_For           | GTGTAAGCTTGCCACCATGGGCATGGACCGGGCACCCTCCCT                                       |
|                                                                                          | ENG_Rev           | GTGTGAATTCCTATCACTACGTAGAATCGAGACCAGGAGGGTTAGGGATAGGCTTACCGCCCTTTGCTTGTGCAACCAGA |
|                                                                                          | ENGpGEXFor        | GTGTGGATCCA TGGACCGGGCACCCTCC                                                    |
|                                                                                          | ENGpGEXRev        | GTGTGTCGACTTATCACTAGCCTTTGCTTGTGCAACCAGA                                         |

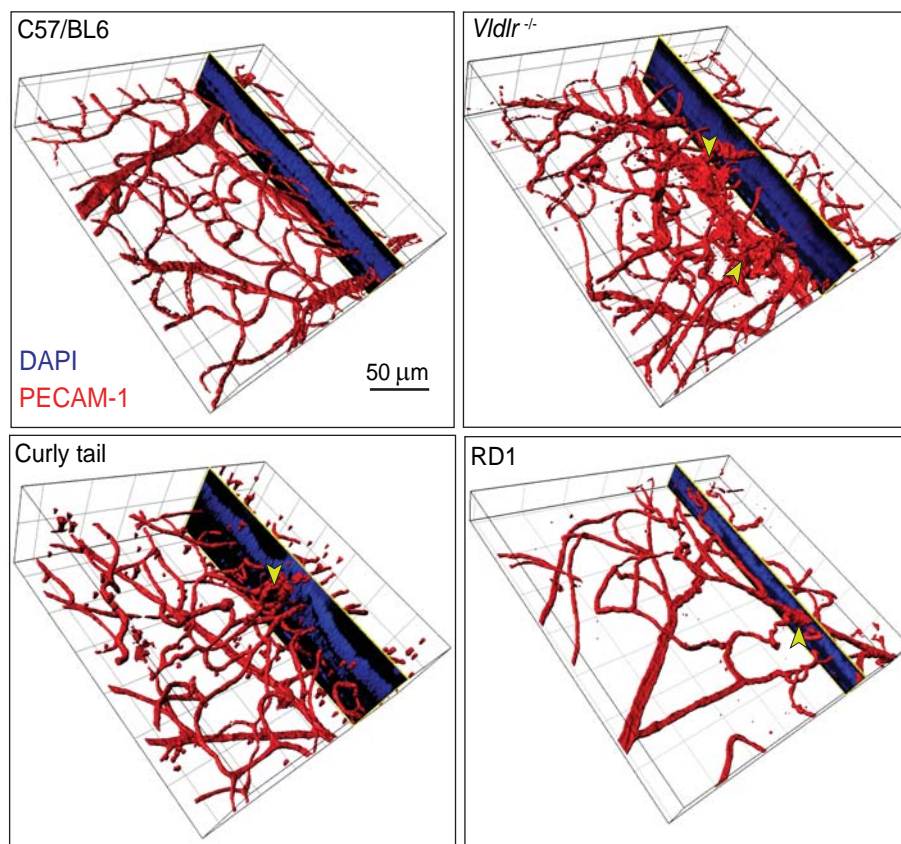

**Supplementary Figure 1. Retinal vasculature of C57/BL6 wild type mouse and three mouse models of retinal disease.** Imaris rendered representative 3D images of PECAM-1 stained retinal vasculature (red) of control C57/BL6 mouse and of the vascular abnormalities (highlighted by arrow heads) in *Vidlr*<sup>-/-</sup>, Curly tail (*Grhl3*<sup>ct/J</sup>) and RD1 mice. In each image a single X-Y section stained for nuclei (blue) is incorporated to show the relative positioning of the nuclear layers (see also Supplementary movies 1-4).



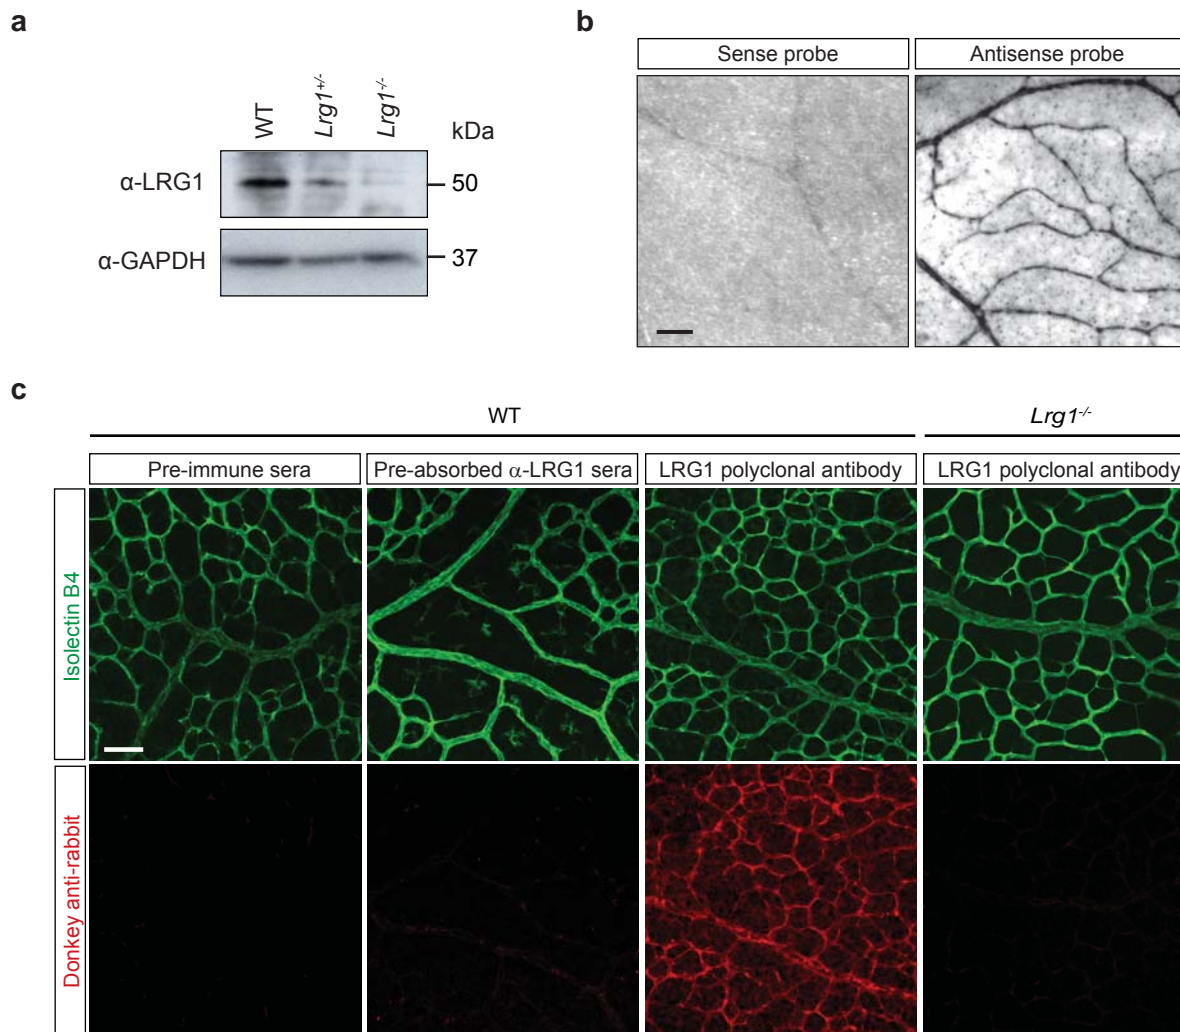

**Supplementary Figure 3. Specificity of *Lrg1* probes and antisera.** **a**, Rabbit anti-LRG1 polyclonal antibody western blot of retinal cell lysates from wild type (WT), heterozygous (*Lrg1*<sup>+/-</sup>) and homozygous (*Lrg1*<sup>-/-</sup>) mice (3 months old) showing loss of LRG1 signal in the latter. **b**, *In situ* hybridisation of *Lrg1* sense and antisense probes in P35 flat-mounted mouse retinae showing positive signal in antisense image. **c**, Flat-mounted WT and *Lrg1*<sup>-/-</sup> retinae stained for vessels (isolectin B4; green) and with pre-immune rabbit sera, pre-absorbed rabbit anti-LRG1 sera and affinity purified rabbit polyclonal anti-LRG1 antibody. Staining with pre-immune rabbit sera and pre-absorbed rabbit sera in WT mice and affinity purified rabbit polyclonal anti-LRG1 antibody in *Lrg1*<sup>-/-</sup> mice give a negative signal. Scale bar 50µm.

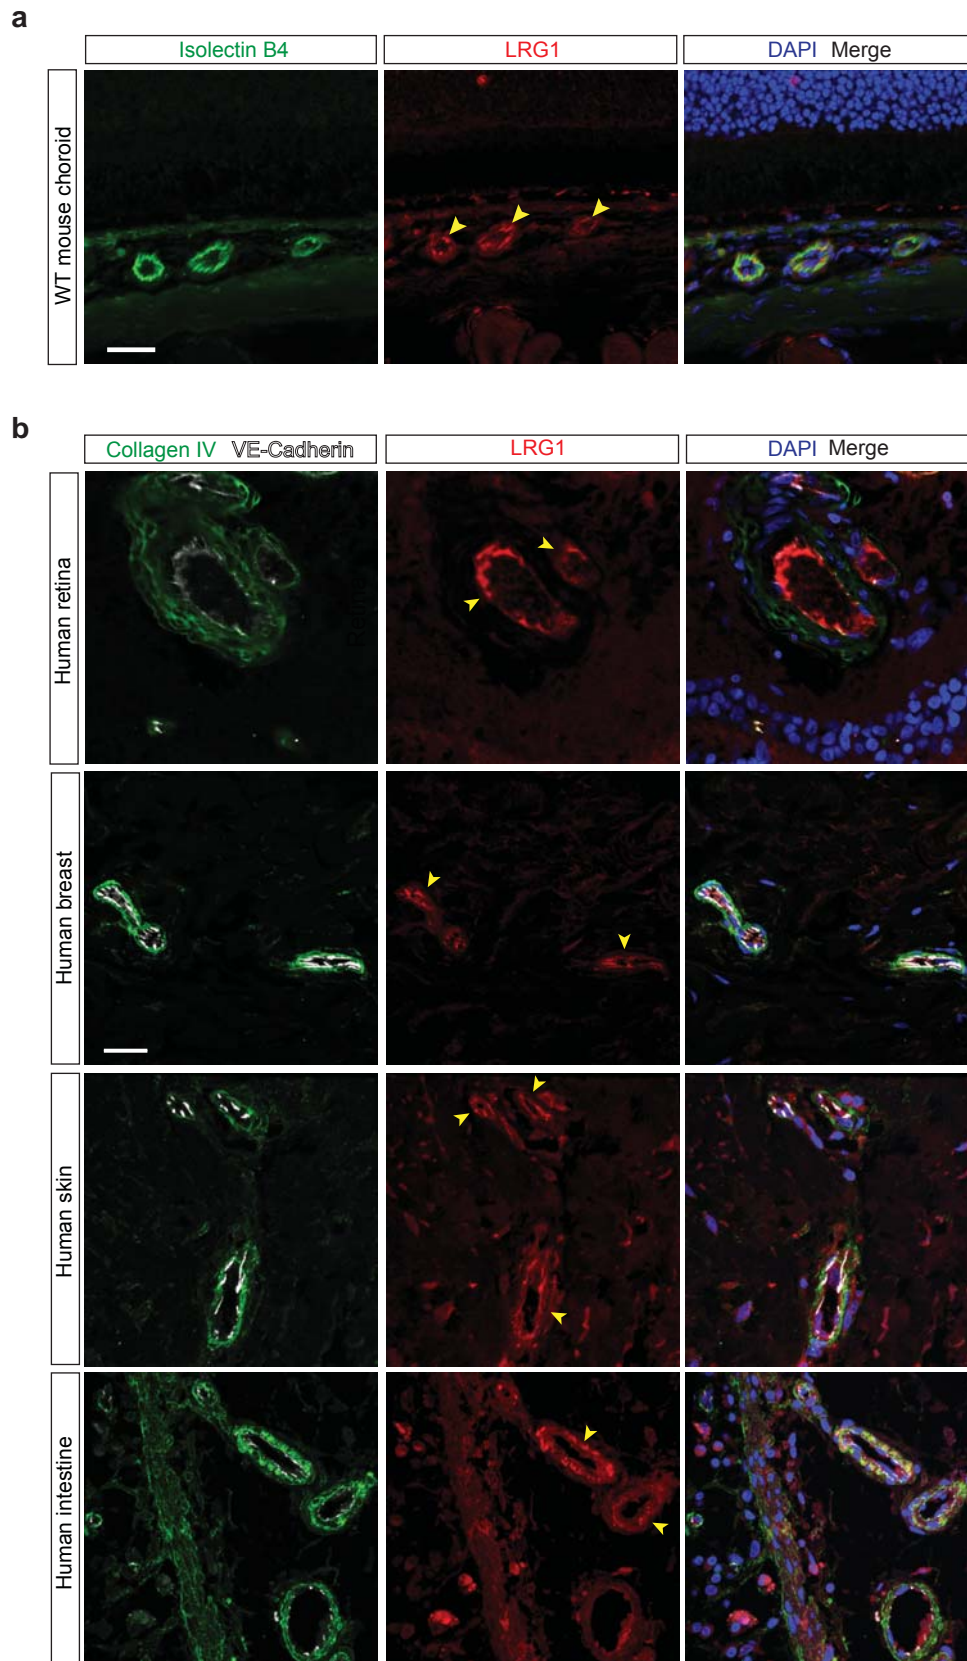

**Supplementary Figure 4. LRG1 is expressed in the vasculature of other tissues. a,** Mouse section of outer retina and choroid showing staining of the choroidal vasculature with isolectin B4 (green), LRG1 (red) and nuclei (blue). LRG1 is expressed primarily in the choroidal vessels. Scale bar 20 $\mu$ m. **b,** Human retina, breast, skin and intestine stained with antibodies against collagen IV (green), VE-cadherin (white), LRG1 (red) and nuclei (blue) shows LRG1 non-exclusive expression with the vasculature. Scale bar 20 $\mu$ m.



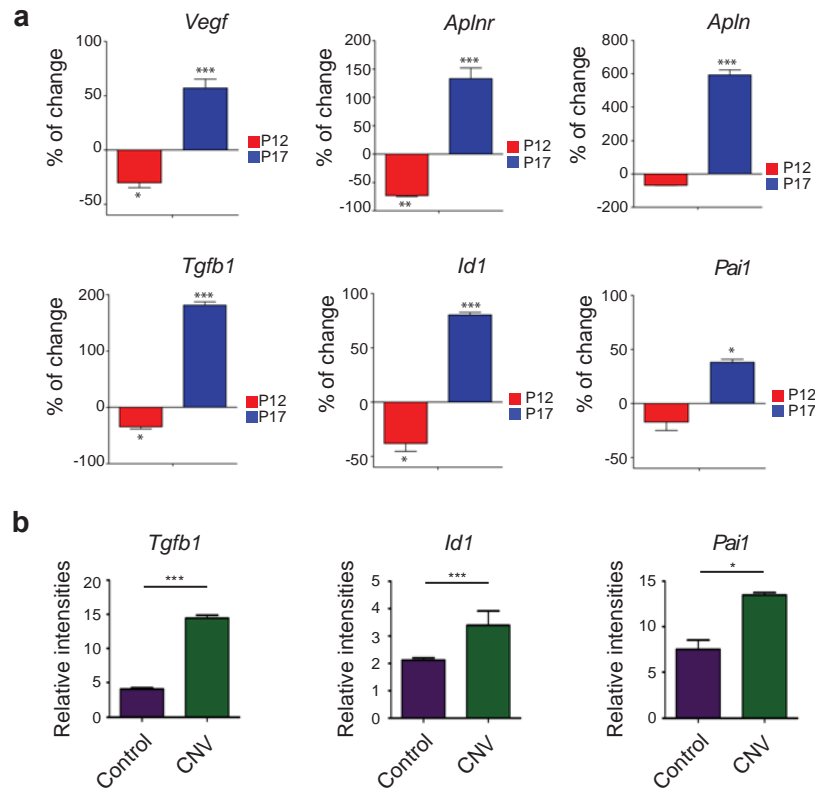

**Supplementary Figure 5. Expression of angiogenic/TGF $\beta$  related genes in the retina of OIR and CNV mice.** **a**, Quantitative RT PCR analysis of the expression of angiogenic/TGF $\beta$  related genes in the retina of OIR mice at P12 and P17. Hypoxic-responsive genes *Vegfa*, *Aplnr* and its ligand *Apln* are reduced during the hyperoxic phase (P12) and significantly enhanced at P17 when the maximal neovascular response is observed. *Tgfb1* gene expression and the AKL1-Smad 1/5/8 pathway induced gene *Id1* are also reduced at P12 and enhanced at P17. The ALK5-Smad 2/3 pathway induced gene *Pai1* is up-regulated at P17. **b**, In the retina of laser induced CNV 7 days post-induction, *Tgfb1*, *Id1* and *Pai1* gene expression is significantly up-regulated compared to untreated age-matched WT C57Bl/6 control mice. \* $P < 0.05$ ; \*\* $P < 0.01$ ; \*\*\* $P < 0.001$ ;  $n = 3$ .

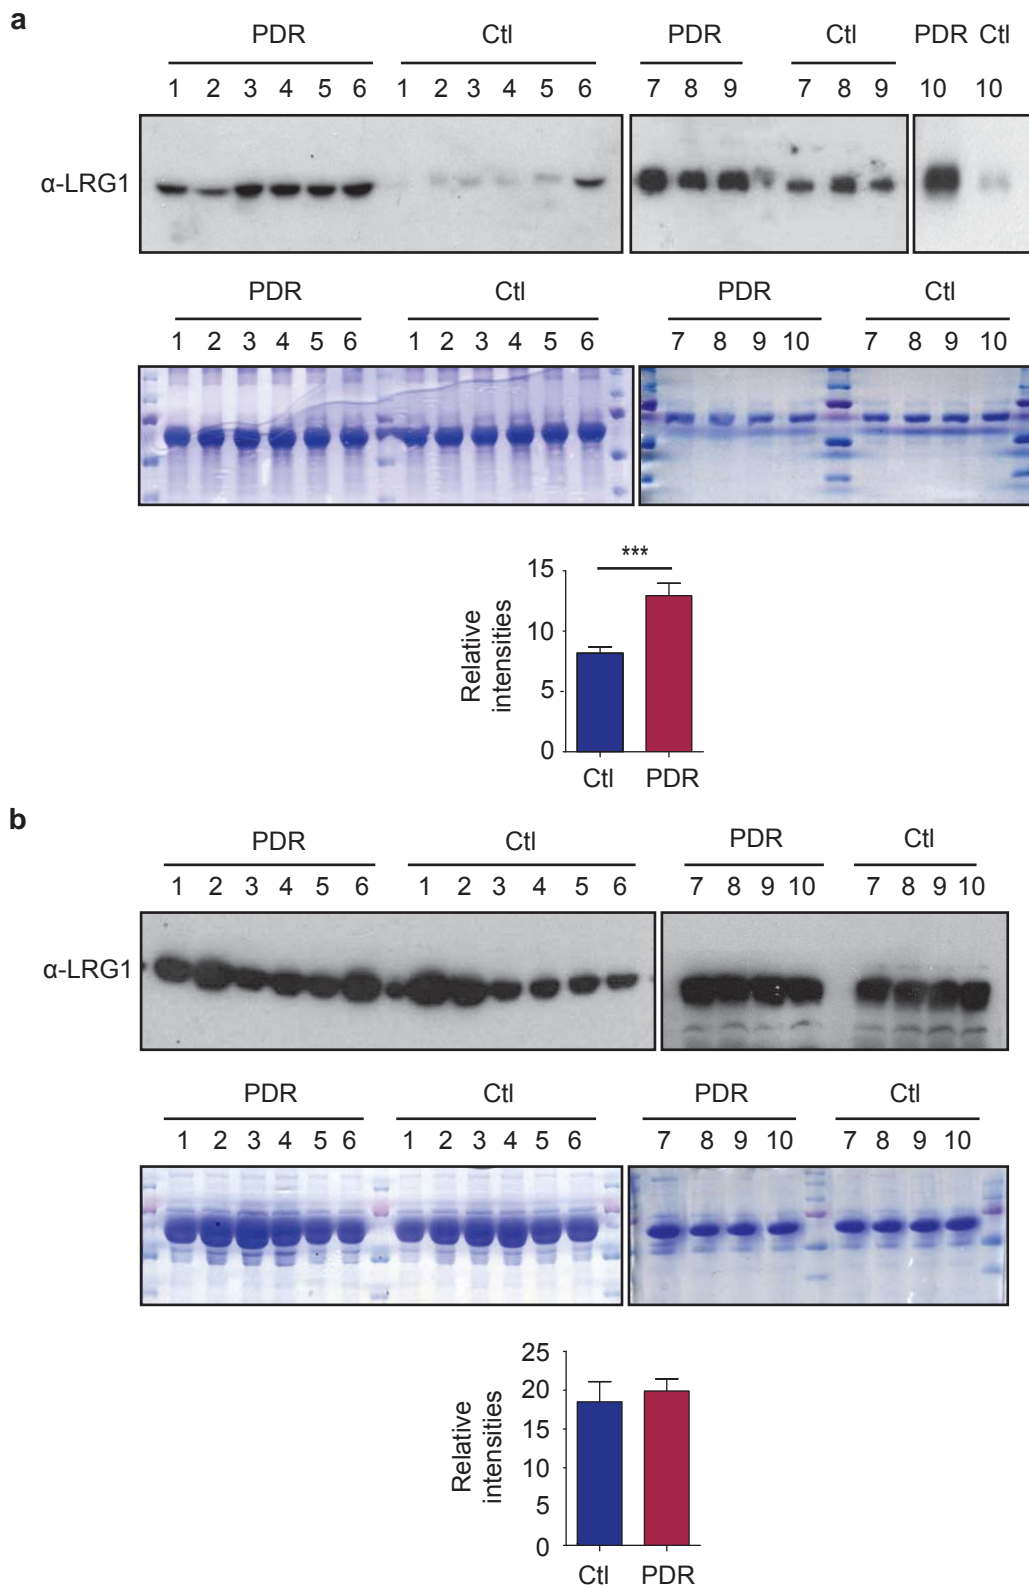

**Supplementary Figure 6. LRG1 protein levels are elevated in the vitreous of proliferative diabetic retinopathy patients.** **a**, Western blots of vitreal LRG1 from ten human subjects with proliferative diabetic retinopathy (PDR) and ten non-PDR controls (with idiopathic epiretinal membranes). Quantitative analysis shows a significant increase in PDR patients ( $***P < 0.001$ ). **b**, No significant difference in plasma LRG1 protein level was observed between PDR and non-PDR controls. Total vitreous/plasma protein was normalized before western blotting as shown by Coomassie blue staining of the SDS-PAGE gel. The LRG1 protein level was quantified by densitometry and normalised against the total protein in vitreous /plasma using Image J. All values represent means  $\pm$  s.e.m. Significance determined by Student's t-test ( $***P < 0.001$ ).

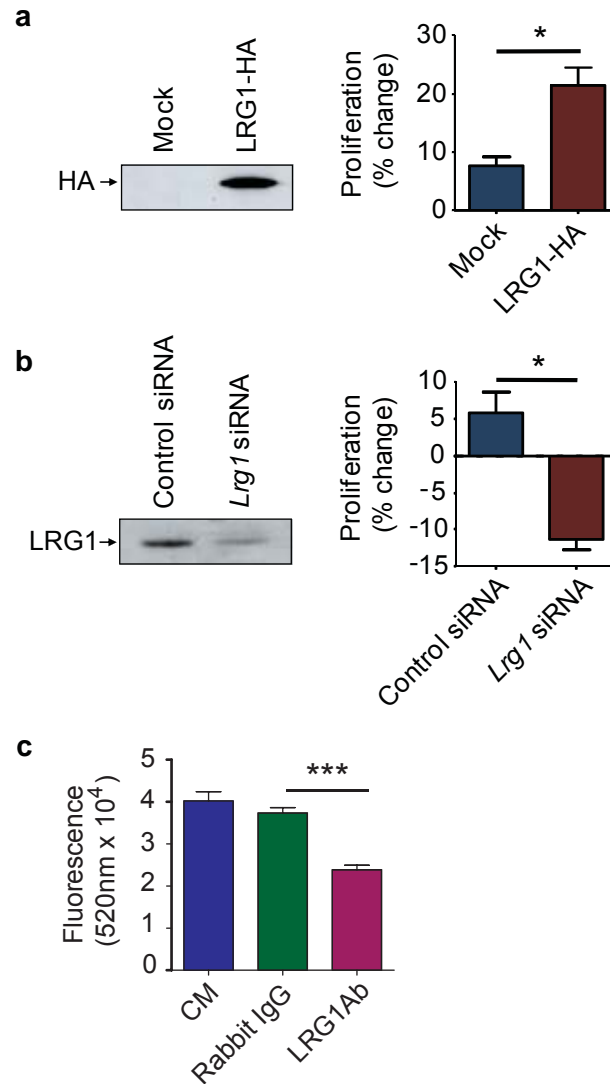

**Supplementary Figure 7. LRG1 contributes to endothelial cell proliferation and migration.** **a**, Western blot analysis showing over-expression of hLRG1-HA (using anti-HA antibody) in conditioned media from hLRG1-HA transfected GPNT brain endothelial cells. The GPNT cells transfected with the human *LRG1* gene exhibit enhanced cell proliferation after 3 h in the presence of 5ng/ml TGF $\beta$ 1 (as determined by Ki67 staining) compared to mock-treated controls. **b**, Western blot showing decrease in expression of LRG1 in conditioned media from *Lrg1* siRNA treated GPNT cells compared to control siRNA-treated controls. Following 5ng/ml TGF $\beta$ 1 treatment, there is a reduction in cell proliferation in *Lrg1* siRNA treated GPNT cells. (\* $P$ <0.05;  $n$ =3). **c**, HUVEC migration through a porous membrane (Transwell migration assay) over 24 hours was inhibited following addition of an anti-LRG1 polyclonal antibody compared to pre-immune rabbit IgG (CM = complete media). Cells that migrated through the Transwell were harvested and lysed in lysis buffer, and then labelled with CyQuant GR Dye for fluorescence measurement at 520nm. (\*\* $P$ <0.001;  $n$ =3).

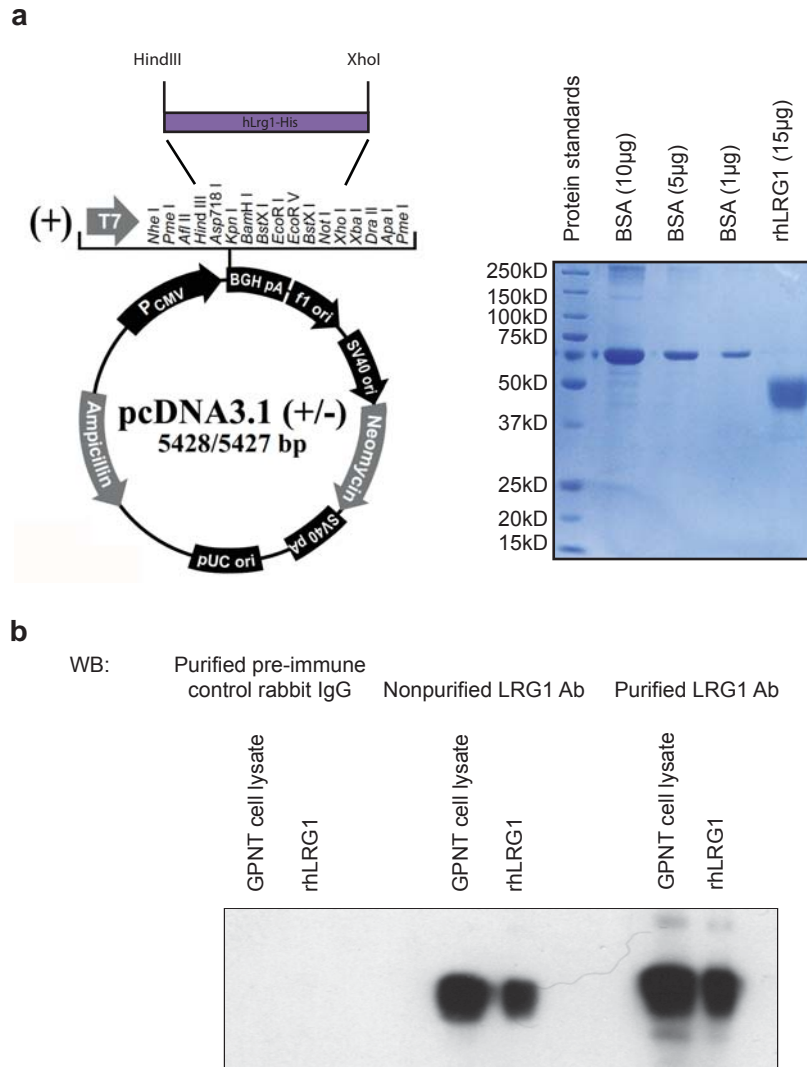

**Supplementary Figure 8. Generation of recombinant human LRG1 protein (rhLRG1) and purified rabbit anti-hLRG1 polyclonal antibody.** **a**, Schematic outline of the rhLRG1 cloning strategy. The coding sequence of human *LRG1* mRNA (NM\_052972) carrying a Kozak consensus sequence at the 5' end and a 6 x His tag at the 3' end was cloned into pcDNA3.1 expression vector at the HindIII/XhoI sites to form pcDNA-rhLRG1-His. Right, purified rhLRG1 protein was analysed by a Coomassie blue stained gel. **b**, The specificity of LRG1 polyclonal antibody (CD10-52) was tested by western blot to detect LRG1 expression in GPNT cell lysate with recombinant human LRG1 as a positive control. Purified pre-immune rabbit IgG was used as a negative control of CD10-52.

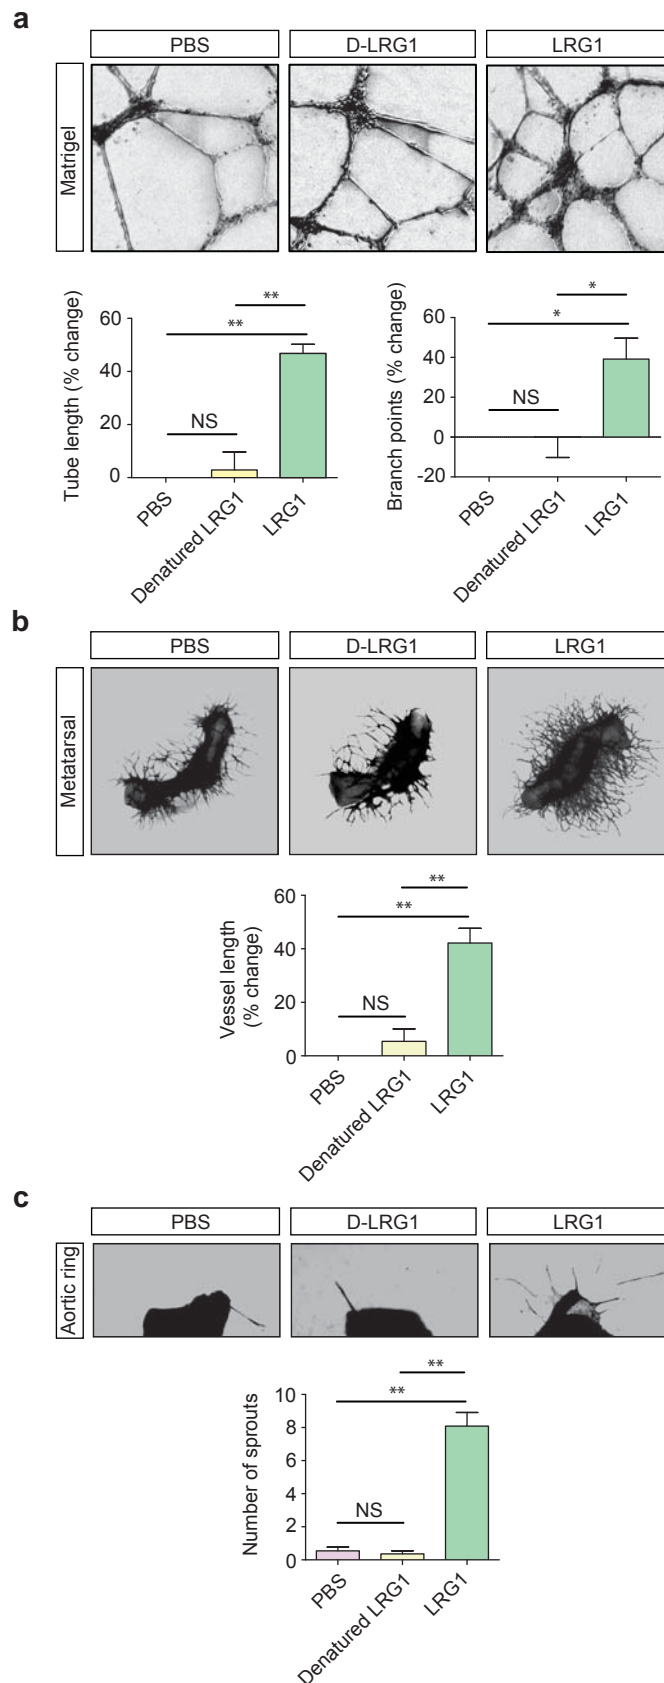

**Supplementary Figure 9. PBS vehicle control versus denatured LRG1 protein control.** Phosphate-buffered saline (PBS) vehicle-treated and denatured protein control-treated HUVEC in the Matrigel tube formation assay exhibit similar endothelial tube formation ( $n \geq 9$  from three independent assays). **b**, PBS and denatured protein control-treated metatarsals ( $n \geq 30$  from three independent assays) and **c**, aortic rings ( $n \geq 15$  from three independent assays) also exhibit similar vessel formation. Data given as mean  $\pm$  s.e.m. Significance determined by Student's t-test ( $*P < 0.05$ ;  $**P < 0.01$ ).

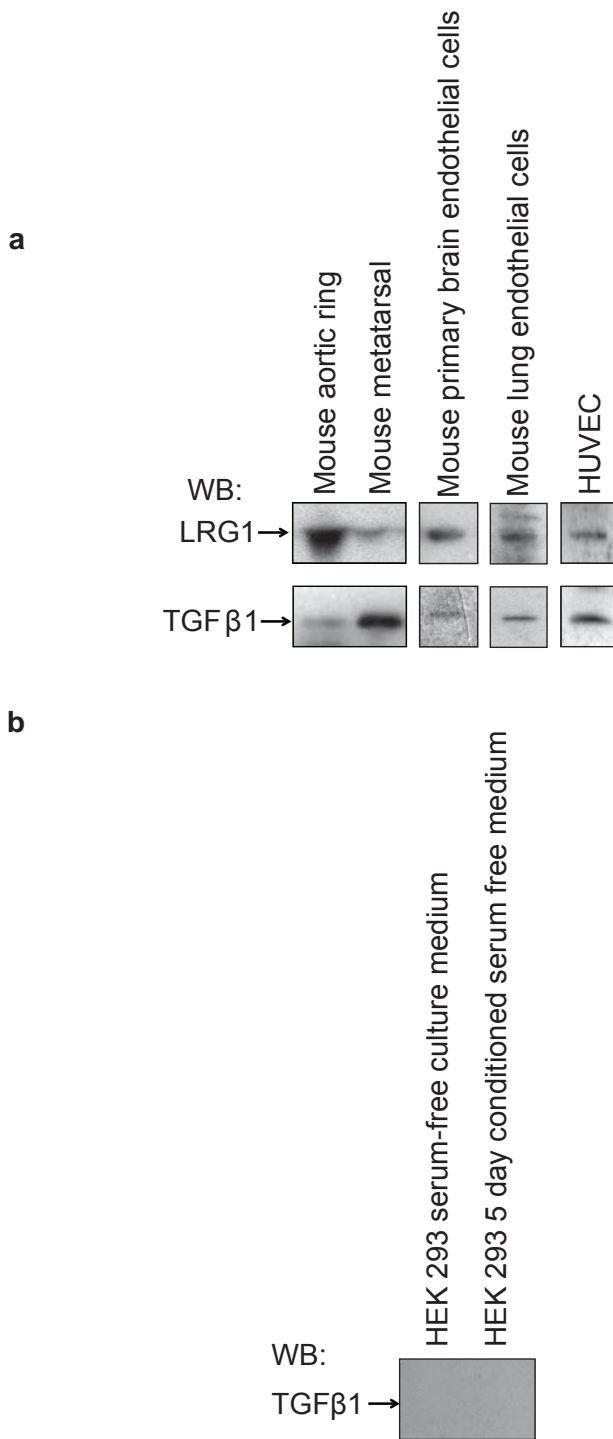

**Supplementary Figure 10. LRG1 and TGFβ-1 expression in conditioned media. a,** Western blot analysis showing the presence of LRG1 and TGFβ-1 in conditioned media harvested from mouse aortic ring, mouse metatarsal, mouse primary brain endothelial cell cultures, immortalised mouse lung endothelial cell cultures (from *Rosa26-CreERT:Eng<sup>f/f</sup>* mouse) and HUVEC Matrigel assays. **b,** Western blot analysis showing the absence of TGFβ-1 in HEK 293 cell culture medium and following 5 days of cell conditioning.

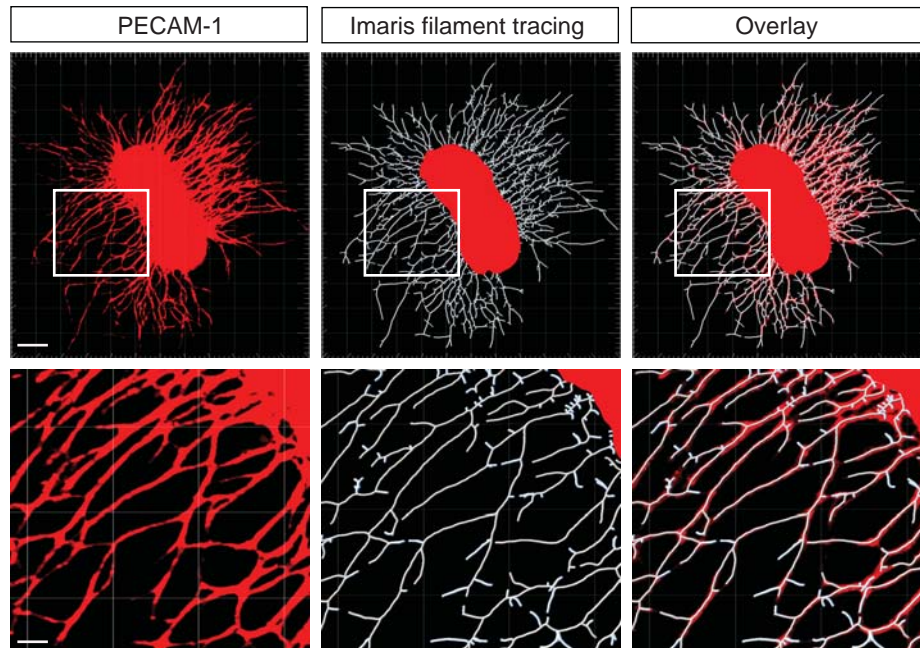

**Supplementary Figure 11. Metatarsal angiogenesis assay vessel quantification.** Example of image rendering for quantification of vascular growth in the metatarsal angiogenesis assay. Metatarsal vessel outgrowth stained with anti-PECAM-1 antibody (red) is captured digitally, and after thresholding vessel configuration quantified (white) using Imaris filament tracing image analysis software (Bitplane AG, Switzerland).

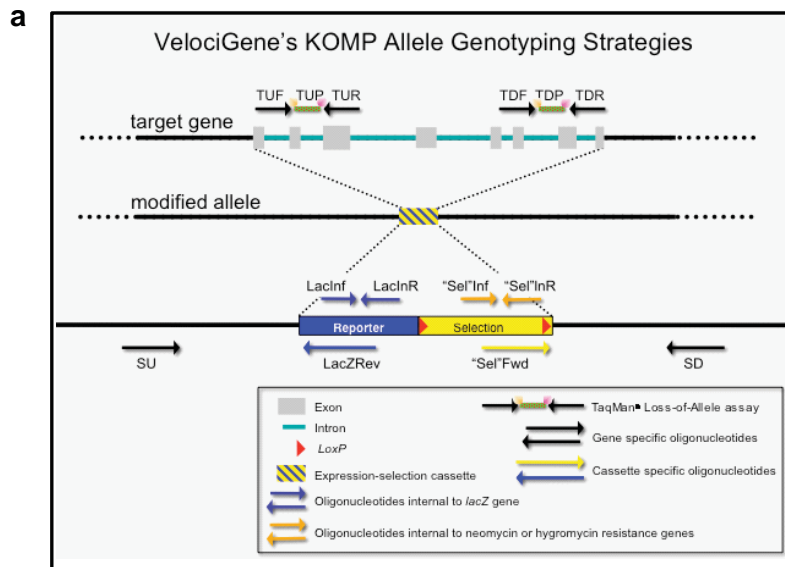

**b**

| Forward Primer | Reverse Primer | Length | WT | HET | KO |
|----------------|----------------|--------|----|-----|----|
| SU             | LacZRev        | 367 bp | -  | +   | +  |
| TUF            | TUR            | 76 bp  | +  | +   | -  |
| NeoFwd         | SD             | 307 bp | -  | +   | +  |

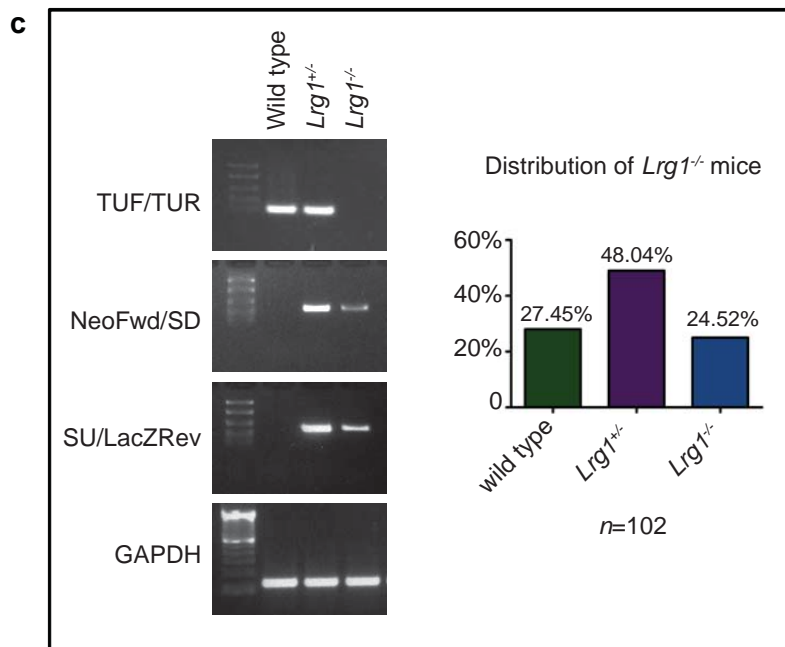

**Supplementary Figure 12. Genotyping the *Lrg1*<sup>-/-</sup> mouse.** **a**, Strategy for PCR-based genotyping *Lrg1* knockout mice (from KOMP). **b**, The sizes of expected PCR products for wild type (WT), heterozygote (HET) and null mutant (KO). **c**, Genotyping examples of WT, heterozygous and homozygous mice and their ratio in the progeny of heterozygous breeding pairs.



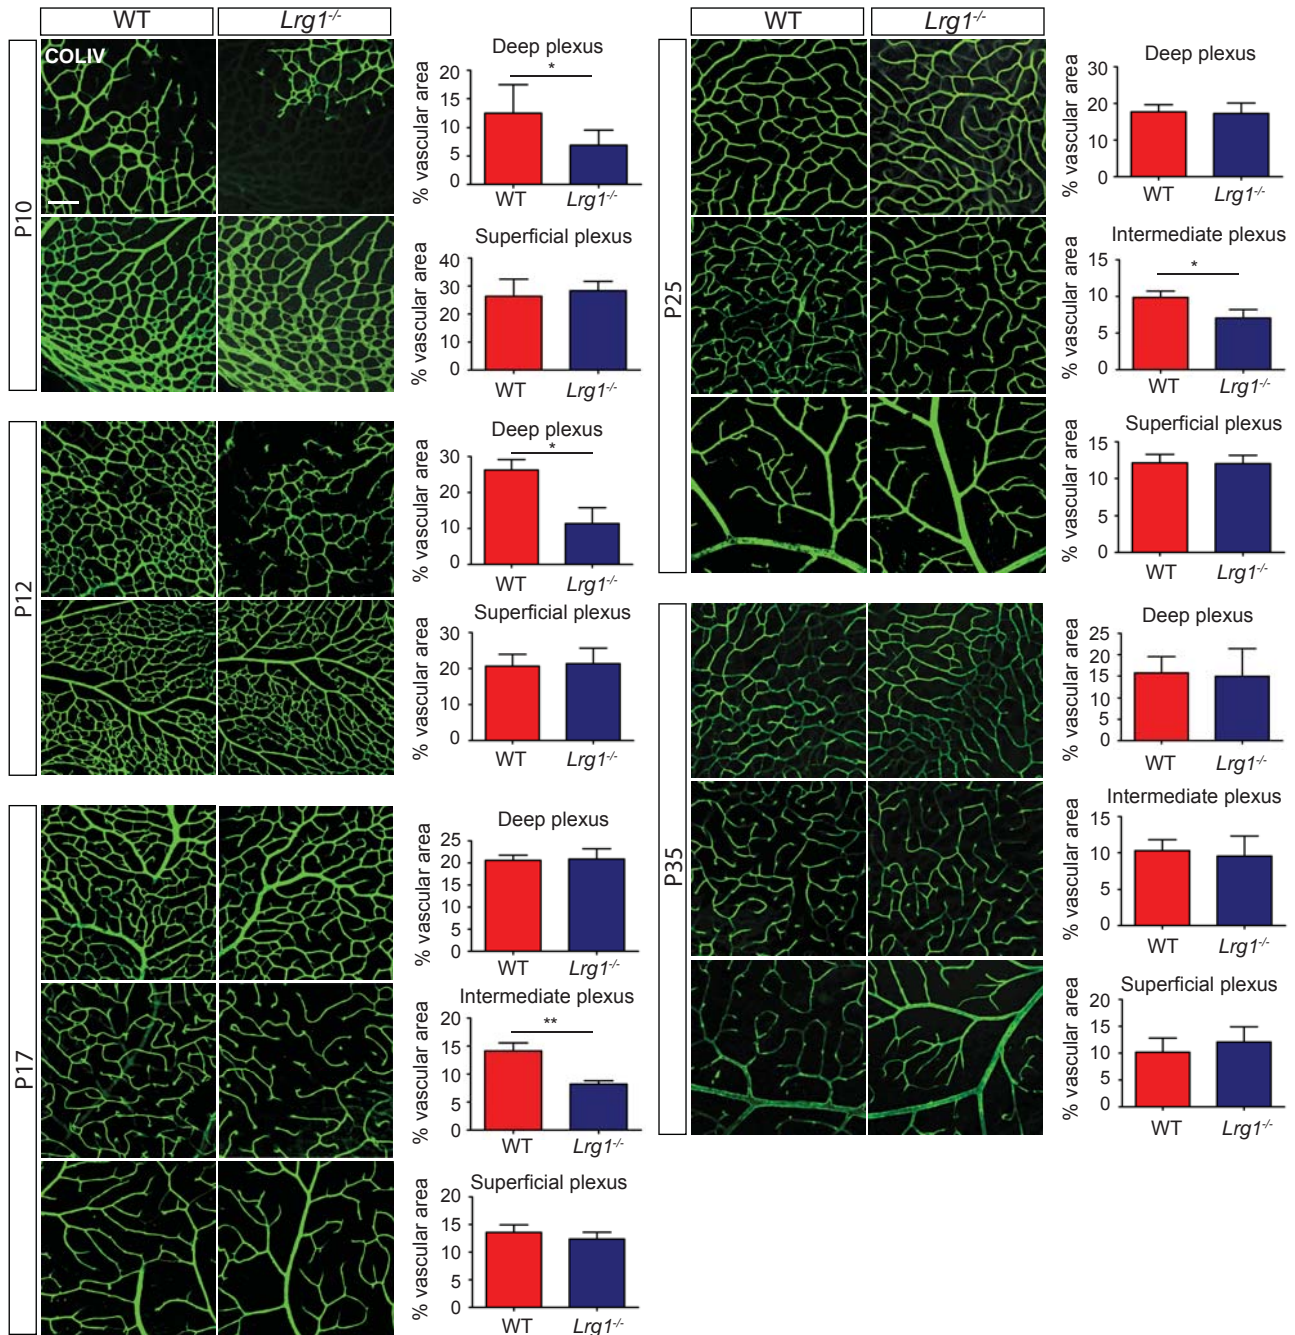

**Supplementary Figure 13. Retinal vascular development in the *Lrg1*<sup>-/-</sup> mouse.** Retinal blood vessels were visualized in retinal flat-mounts using an anti-collagen IV antibody followed by FITC-conjugated secondary and imaged using a confocal scanning laser microscope. Z-sections were captured and analysed from the central and peripheral retina (four regions per retina each of 0.4mm<sup>2</sup>) to reveal the inner, intermediate and deep vascular plexuses of the C57/Bl6 wild type (WT) and *Lrg1*<sup>-/-</sup> mouse ( $n = 6$  for each group). Vascularization of the retina is delayed in *Lrg1*<sup>-/-</sup> mice compared to that in WT littermate controls at P10, P12, P17 and P25. The P35 retinal vasculature in the *Lrg1*<sup>-/-</sup> mice shows no difference compared to that from WT. Significance determined by Student's t-test (\* $P < 0.05$ ; \*\* $P < 0.01$ ). Scale bar = 40 $\mu$ m.

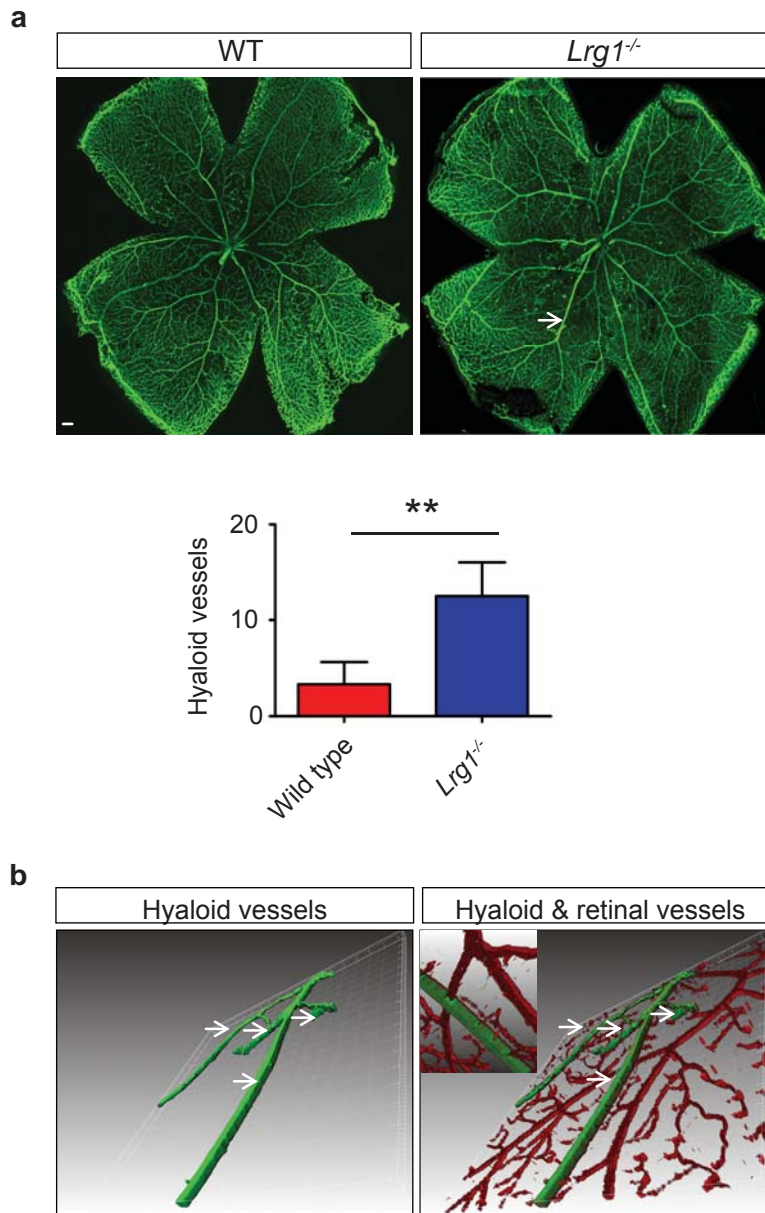

**Supplementary Figure 14. Hyaloid vessels persist in the *Lrg1*<sup>-/-</sup> mouse.** **a**, Wild type (WT) flat mounted retina stained for the vasculature (anti-collagen IV) show regression of the hyaloid vasculature at P35. In the *Lrg1*<sup>-/-</sup> mouse retina persistent hyaloid vessels (arrow) at P35 can be observed. Only primary radial hyaloid vessels were enumerated ( $n=30$  for each group). Scale bar =  $68\mu\text{m}$ . **b**, Following 3D rendering persistent hyaloid vessels (green) are seen integrating into the superficial retina to give rise to anastomosis with the retinal vasculature ( $n=30$  for each group). Significance determined by Student's t-test (\*\* $P<0.01$ ).

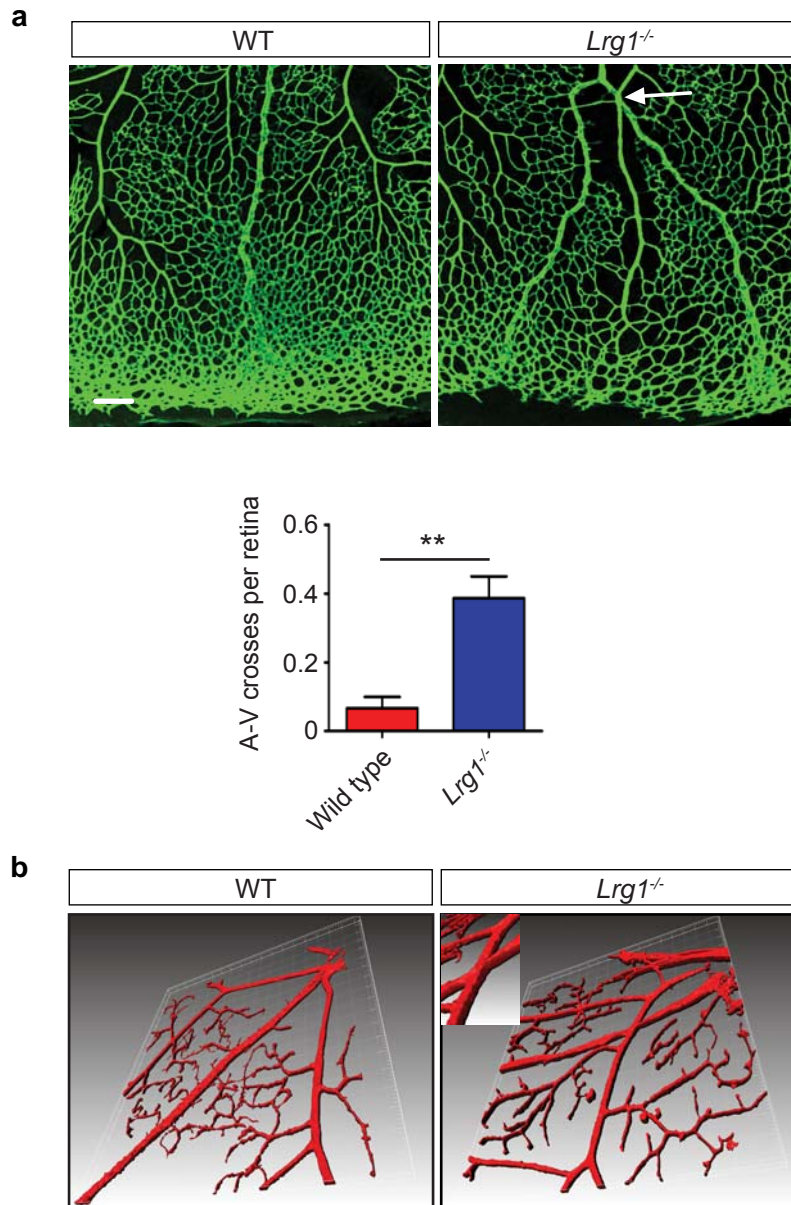

**Supplementary Figure 15. Increased arteriovenous crossing in the *Lrg1*<sup>-/-</sup> mouse. **a**, At P10 the wild type (WT) retina shows a regular alternating pattern of arteries and veins. At the same developmental stage *Lrg1*<sup>-/-</sup> mice exhibit an approximate 5-fold increase in the frequency of arteriovenous crossovers within the inner superficial vascular plexus (white arrow). **b**, 3D Imaris rendering shows close apposition and possible anastomosis between the crossing arteries and veins ( $n=30$  for each group). Significance determined by Student's t-test (\*\* $P<0.01$ ). Scale bar 120 $\mu$ m.**

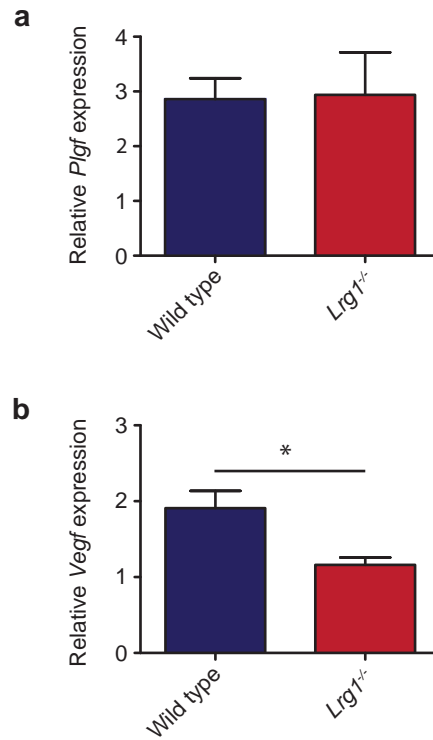

**Supplementary Figure 16. *Plgf* and *Vegfa* gene expression in *Lrg1*<sup>-/-</sup> mice.** Quantitative RT PCR analysis of **a**, *Plgf* mRNA expression in the retina of 3 month old WT and *Lrg1*<sup>-/-</sup> mice relative to *Gapdh* ( $n=4$ ). **b**, *Vegfa* expression in the retina of 3 month old WT and *Lrg1*<sup>-/-</sup> mice relative to *Gapdh* ( $n=4$ ). Significance determined by Student's t-test ( $*P<0.05$ ).

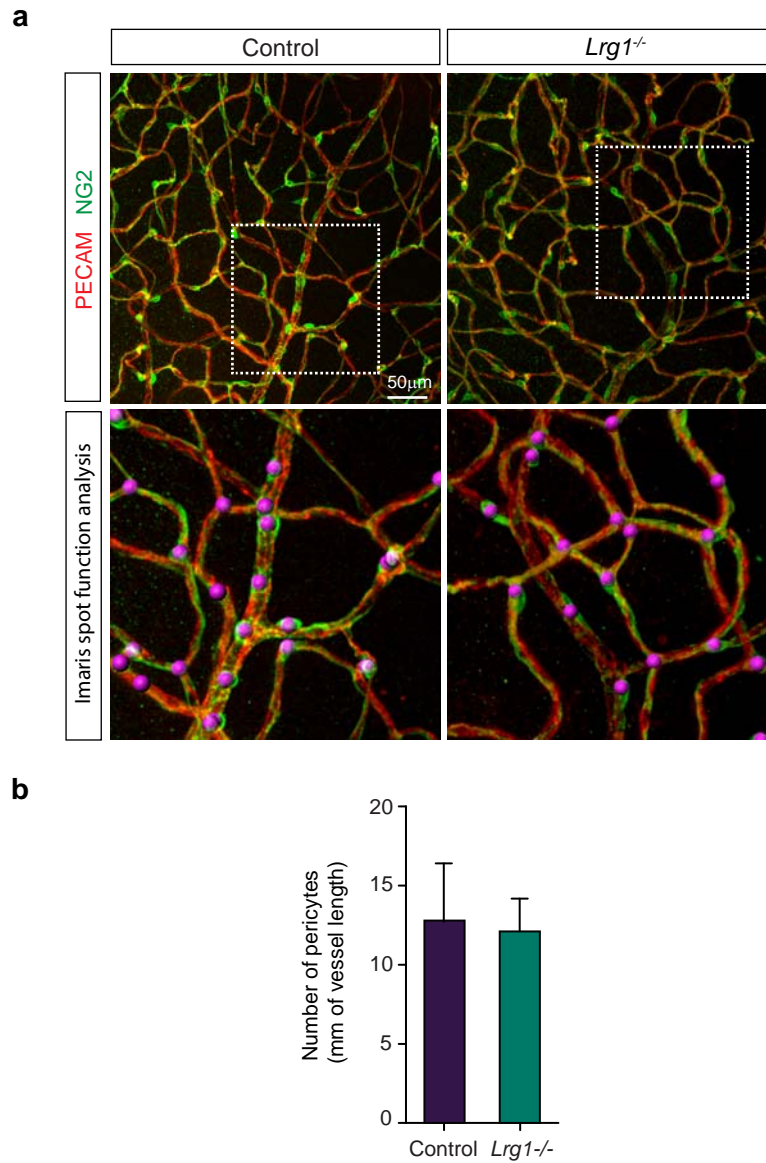

**Supplementary Figure 17. Pericyte coverage is identical in WT and *Lrg1*<sup>-/-</sup> mice. a,** Representative confocal images of retinal vasculature (upper panels) from WT ( $n=3$ ) and *Lrg1*<sup>-/-</sup> ( $n=3$ ) mice stained for PECAM-1 (red) and NG2 (green). Lower panels depict pericyte detection using the spot function (magenta spots) in Imaris software of white boxed area from upper images. **b,** Histogram showing average number of pericytes per mm of vessel length. No significant difference was observed (Student's t-test).

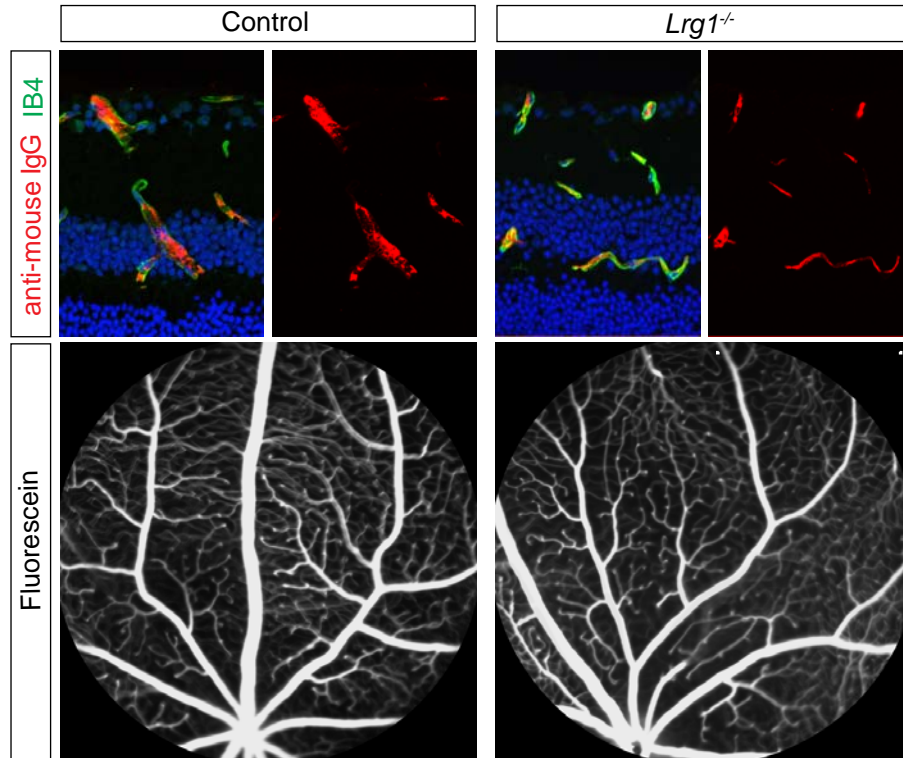

**Supplementary Figure 18. Retinal vascular barrier properties are retained in the *Lrg1*<sup>-/-</sup> mouse.** Upper panels show staining of representative retinal sections for blood vessels (isolectin B4 - green), mouse IgG (Ab 594 - red) and nuclei (DAPI - blue). IgG is retained within the vascular compartment in control (left) and *Lrg1*<sup>-/-</sup> mice (right; *n*=3 animals for each group) indicating retention of blood-retinal barrier properties. The lower panels show representative fluorescein angiographs from control (left) and *Lrg1*<sup>-/-</sup> mice (right; *n*=3 animals for each group) at late phase (8 minutes) post fluorescein injection showing an absence of fluorescein leakage from the blood and hence maintenance of an intact blood-retinal barrier in the latter.

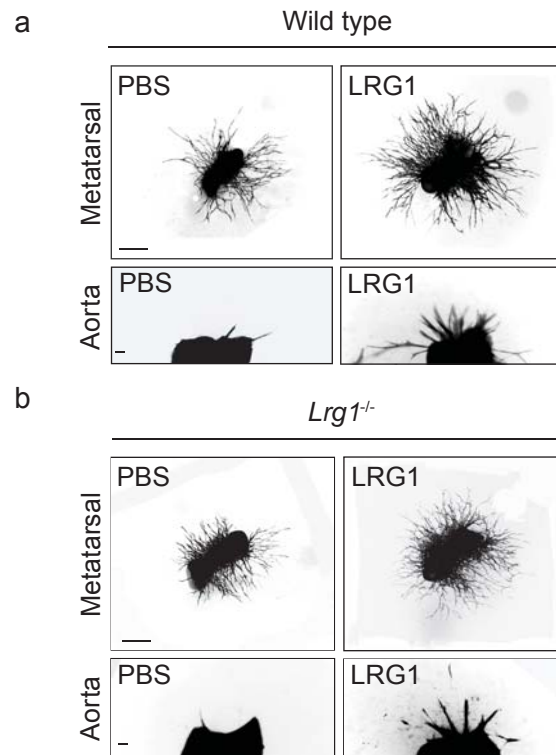

**Supplementary Figure 19. LRG1 promotes angiogenesis in WT mice and rescues angiogenesis in *Lrg1*<sup>-/-</sup> mice. a**, Examples of vessel outgrowth in the metatarsal (top row) and aortic ring (bottom row) assay showing enhanced angiogenesis following LRG1 treatment. **b**, Examples of vessel outgrowth in metatarsals (top row) and aortic rings (bottom row) from *Lrg1*<sup>-/-</sup> mice showing rescue of LRG1 induced angiogenesis. See Figure 2 for quantification. Scale bar = 1,500µm.

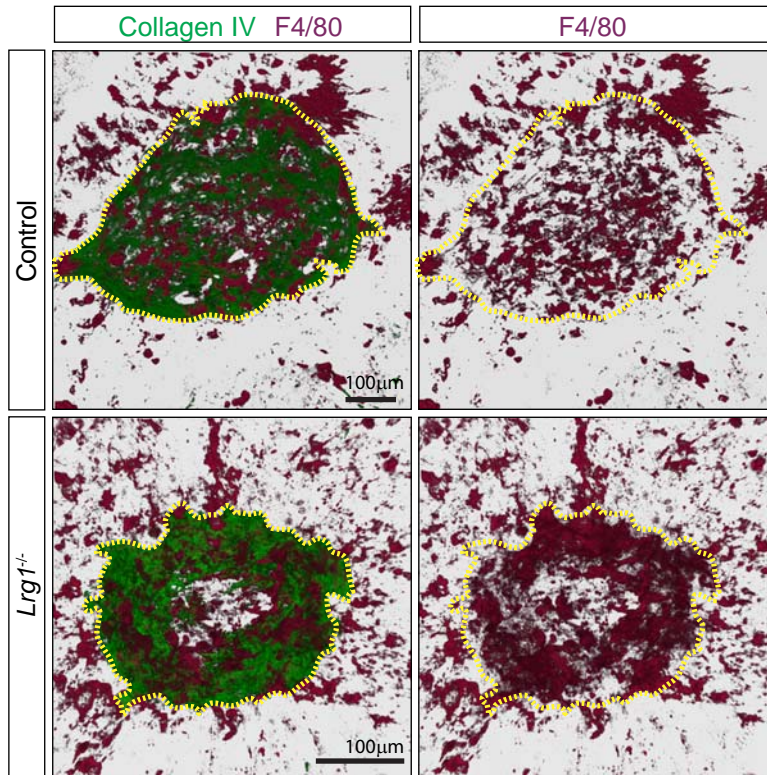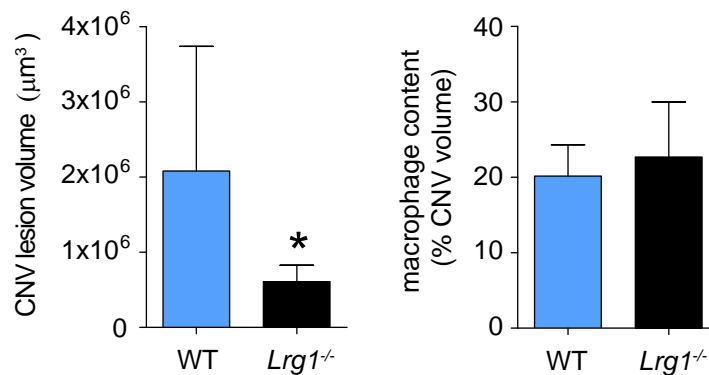

**Supplementary Figure 20. Macrophage content of CNV lesions is similar in WT and *Lrg1*<sup>-/-</sup> mice.** Representative Imaris reconstructed images of CNV lesions from WT control (top row) and *Lrg1*<sup>-/-</sup> (bottom row) mice. CNV lesion is stained for collagen IV (green) and macrophages stained for F4/80 (purple). The CNV lesion has been demarcated with a yellow dotted line. Below, histograms showing CNV lesion volume (left) and macrophage content (right) expressed as a percentage of CNV volume in WT and *Lrg1*<sup>-/-</sup> mice.



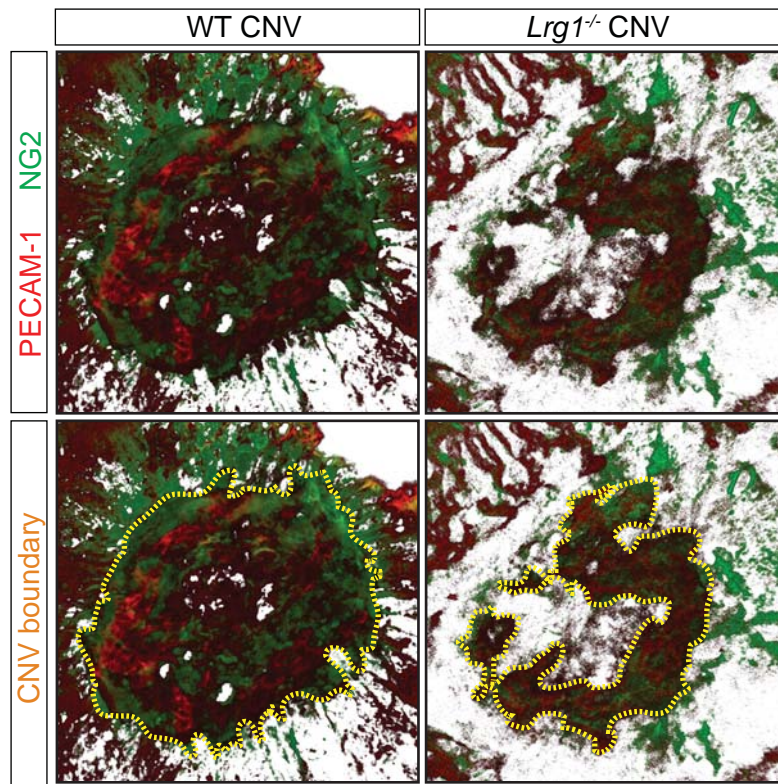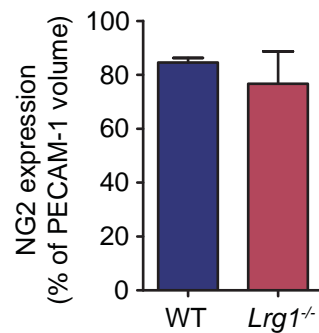

**Supplementary Figure 21. CNV NG2 (pericyte) coverage is similar in WT and *Lrg1*<sup>-/-</sup> mice.** Representative Imaris reconstructed images of CNV lesions from WT control (top left) and *Lrg1*<sup>-/-</sup> (top right) mice. CNV lesions are stained for PECAM-1 (red) and NG2 (green). Lower panels show delineation of CNV lesion (yellow dotted line). Below, histogram shows NG2 volume as a percentage of PECAM-1 volume in delineated CNV lesions in WT and *Lrg1*<sup>-/-</sup> mice. *n* = 3 per group.

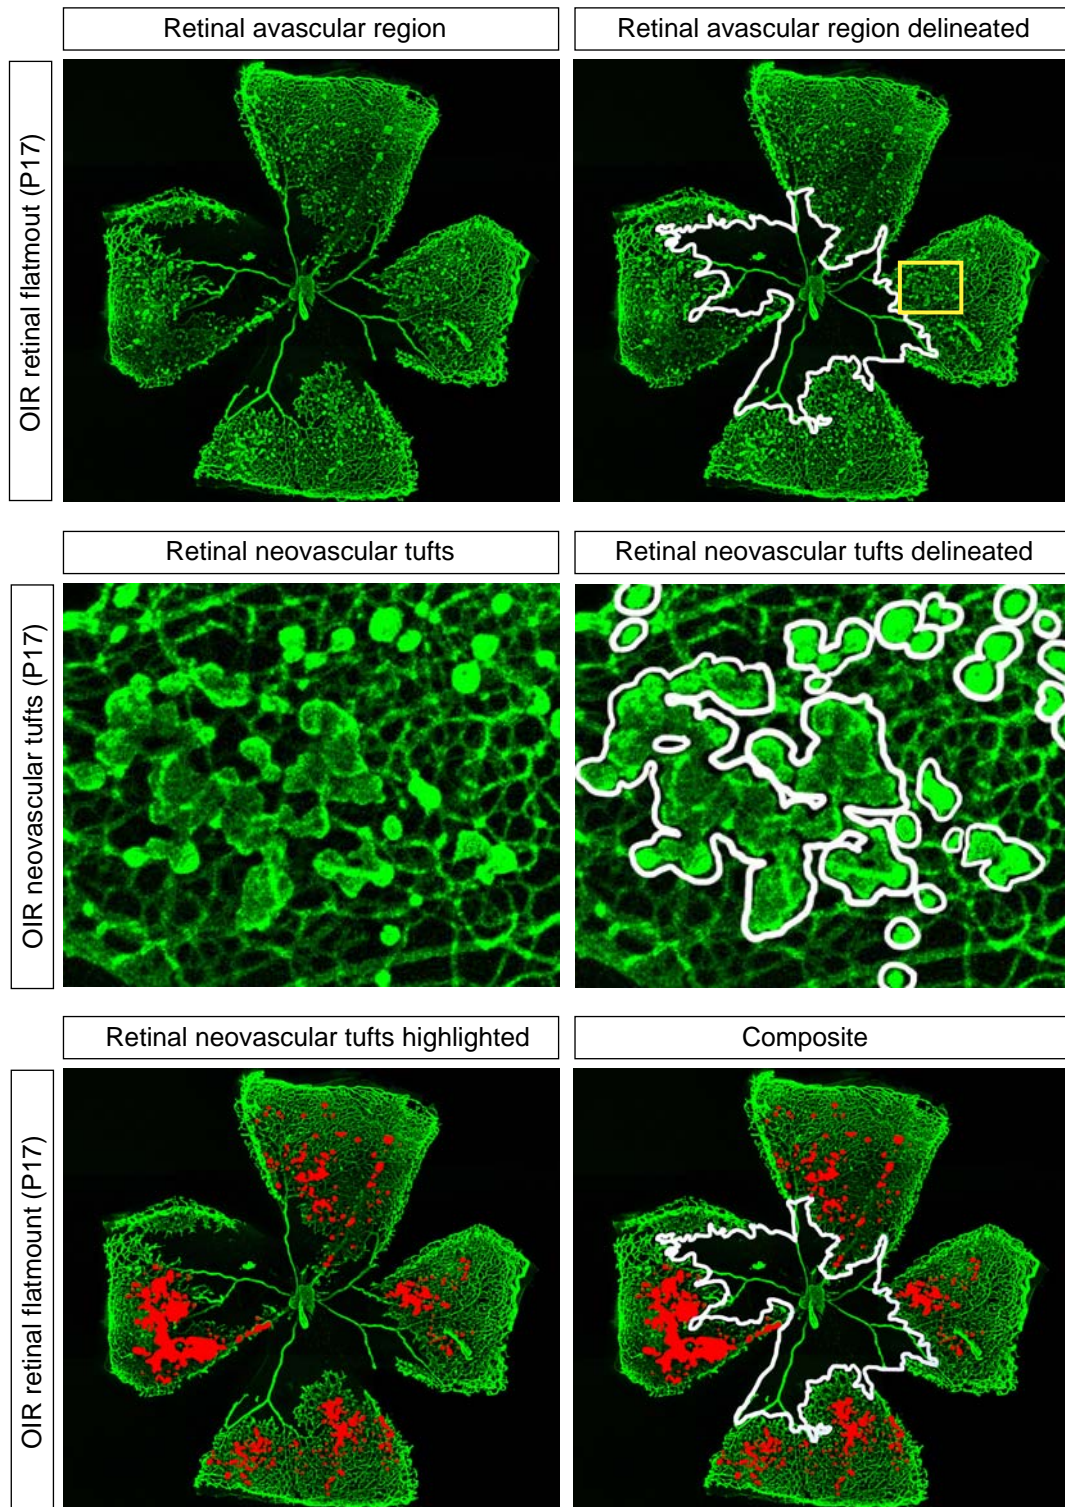

**Supplementary Figure 22. Delineation of retinal avascular region and neovascular tufts in OIR for quantitative analysis.** Top left shows a representative reconstructed (tile) flat mounted retina stained for PECAM-1 (green) from an OIR-induced mouse at P17. Top right illustrates the manual delineation of the vascular/avascular interface (white line) for area analysis. Middle left shows higher power image of yellow boxed area in top right to reveal the neovascular tufts. These are manually delineated (white line) for area analysis. Bottom left image shows artificially coloured neovascular delineated tufts (red) and the bottom right the composite showing neovascular tufts (red) and avascular region (white line).

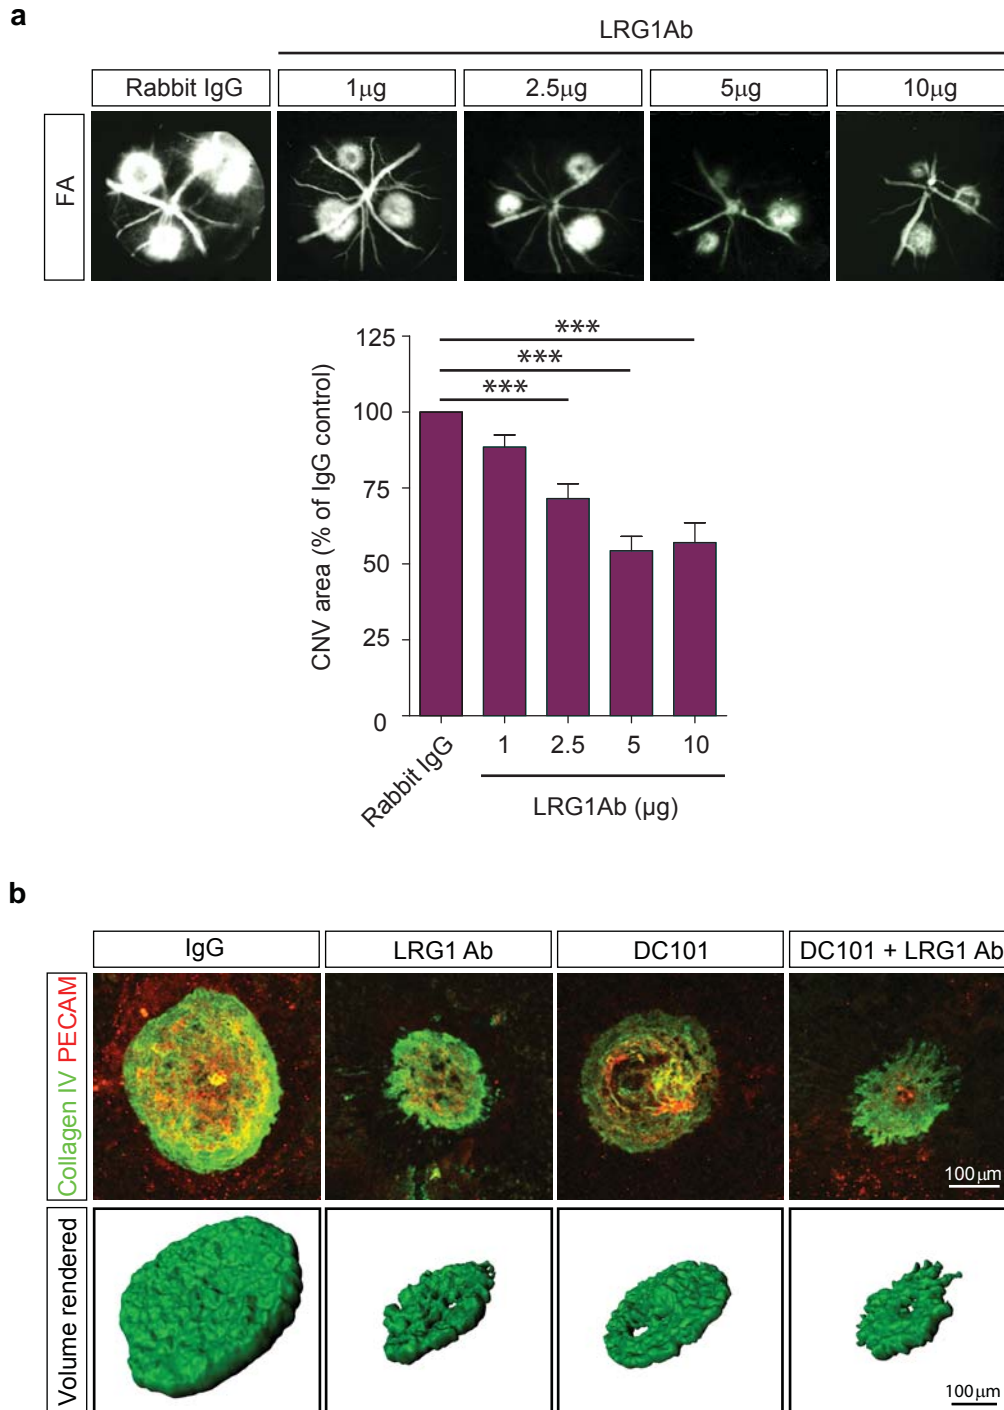

**Supplementary Figure 23. Antibody blockade of LRG1 inhibits CNV lesion formation.**

**a**, Representative fluorescein angiographs of laser-induced CNV lesions from WT mice following intravitreal delivery of control IgG or LRG1 polyclonal antibody. The histogram shows a dose-dependent inhibition of CNV lesion area by the anti-LRG1 antibody. Data analysed by one-way ANOVA ( $P = 0.0001$ ) with significance from controls determined by Bonferroni's multiple comparison post-hoc analysis ( $n \geq 15$  for each group,  $***P < 0.001$ ). **b**, Representative confocal images (top) and 3D rendered equivalent reconstructions (bottom) of laser-induced CNV lesions from control, anti-LRG1 and anti-VEGFR2 (DC101) antibody treated WT mice. Whole mounts were stained for collagen IV (green) and PECAM-1 (red) and confocal Z stacks were 3D rendered using Imaris software.

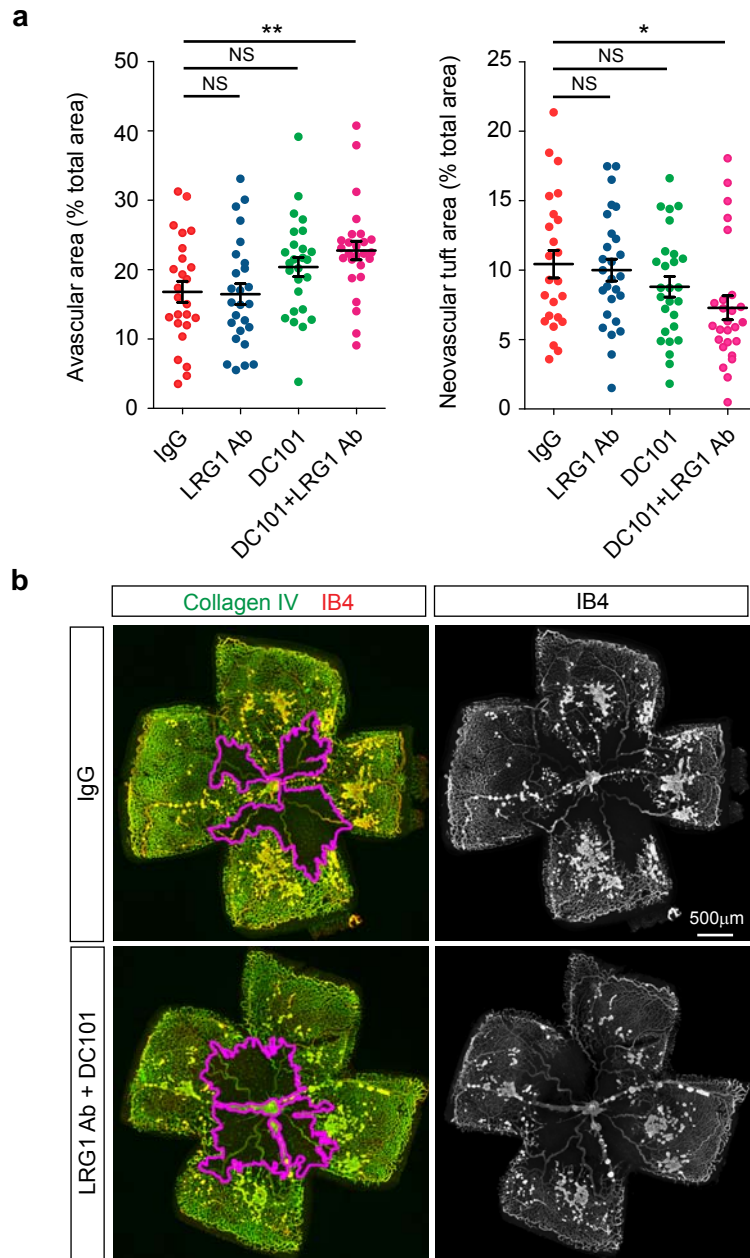

**Supplementary Figure 24. Combined antibody blockade of LRG1 and VEGFR2 inhibits angiogenesis in OIR.** **a**, Effect of anti-LRG1 blocking antibody (50mg/kg intraperitoneal in 100µl at P12 and P15), anti-VEGFR2 blocking antibody (DC101, 12.5mg/kg intraperitoneal at P12 and P15) or a combination of the two, on retinal revascularisation and neovascular tuft formation. With these treatment regimens significant inhibition was only observed with combined therapy, reducing both revascularisation (\*\* $P < 0.01$ ,  $n \geq 15$  for each group) and neovascular tuft formation (\* $P < 0.05$ ;  $n \geq 15$  for each group). One-way ANOVA ( $P = 0.0002$ ) with significance from controls determined by Bonferroni's multiple comparison post-hoc analysis. **b**, Representative images of OIR from IgG control and anti-LRG1/DC101 treated mice. Whole mounts were stained for collagen IV (green) and isolectin B4 (red). Avascular region at day P17 (5 days post hyperoxia) is delineated by the magenta line. Neovascular tufts are more clearly observed as brighter regions on the greyscale images.

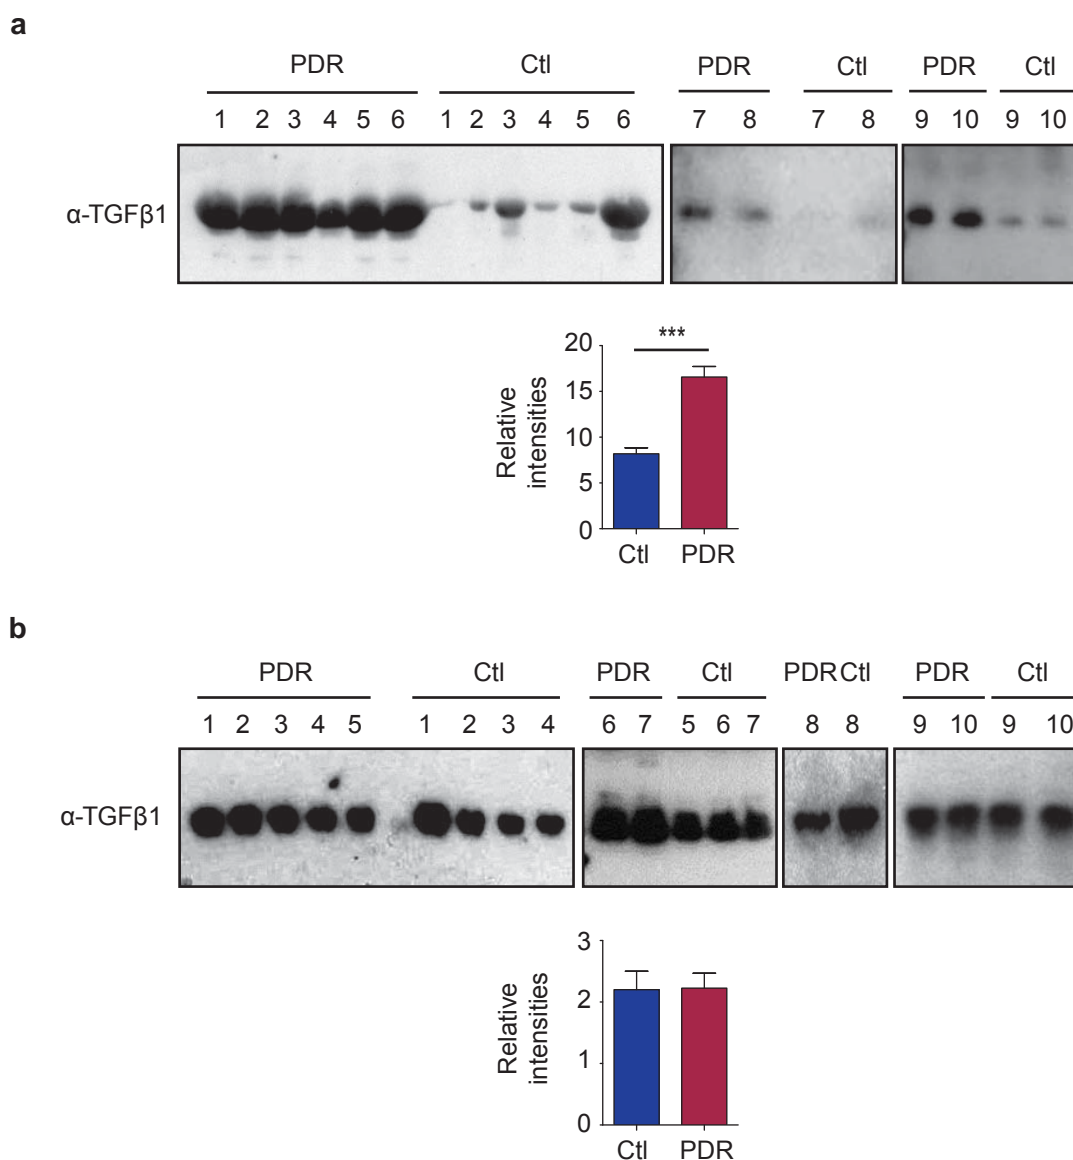

**Supplementary Figure 25. TGF $\beta$ 1 is increased in the vitreous of patients with proliferative diabetic retinopathy.** **a**, Western blots of vitreal TGF $\beta$ 1 from ten patients with proliferative diabetic retinopathy (PDR) and ten non-PDR controls (patients with epiretinal membranes). Quantitative analysis shows a significant increase of TGF $\beta$ 1 in PDR patients (\*\* $P$ <0.001). **b**, No significant difference in plasma TGF $\beta$ 1 protein level was observed between PDR and non-PDR control patients. Total vitreous/plasma protein was normalized before western blotting as shown by Coomassie blue staining of the SDS-PAGE gel in Supplementary figure 5. The TGF $\beta$ 1 protein level was determined by relative intensities against the total protein in vitreous /plasma using Image J. All values represent means  $\pm$  s.e.m. Significance determined by Student's t-test (\*\* $P$ <0.001).

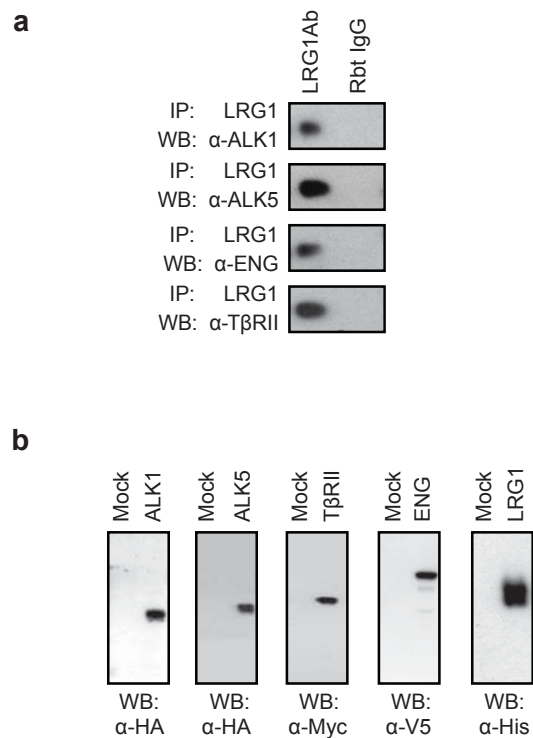

**Supplementary Figure 26. Binding of LRG1 to TGFβ receptors and generation of peptide-tagged LRG1 and TGFβ receptor extracellular domains.** **a**, Western blots showing that immunoprecipitation of LRG1 with polyclonal rabbit antibody from HUVEC lysates co-immunoprecipitates the TGFβ receptors TβRII, ALK1, ALK5 and endoglin (ENG). (Representative of  $n \geq 3$  for each assay). **b**, Western blot of peptide-tagged recombinant extracellular domains of TGFβ receptors TβRII (Myc-tagged), ALK1 (HA-tagged), ALK5 (HA-tagged) and ENG (V5-tagged) and His-tagged LRG1 in transfected HEK 293 cell medium. (Representative western blots;  $n \geq 3$  for each experiment).

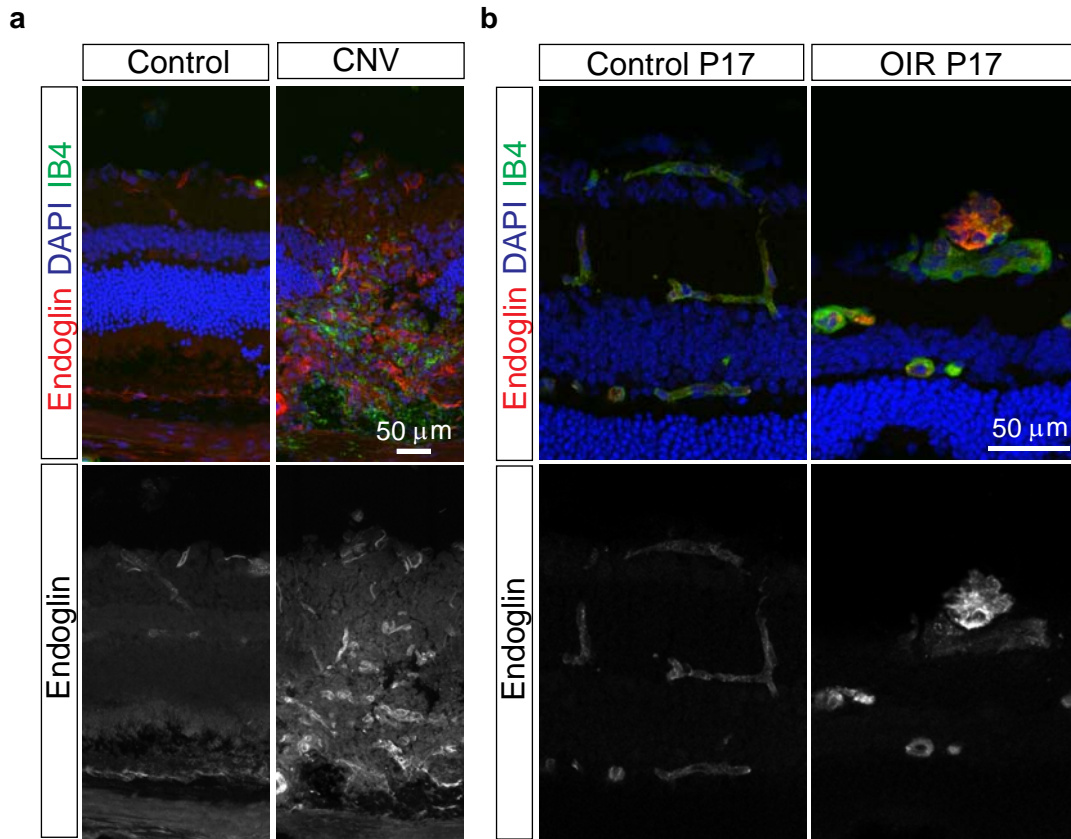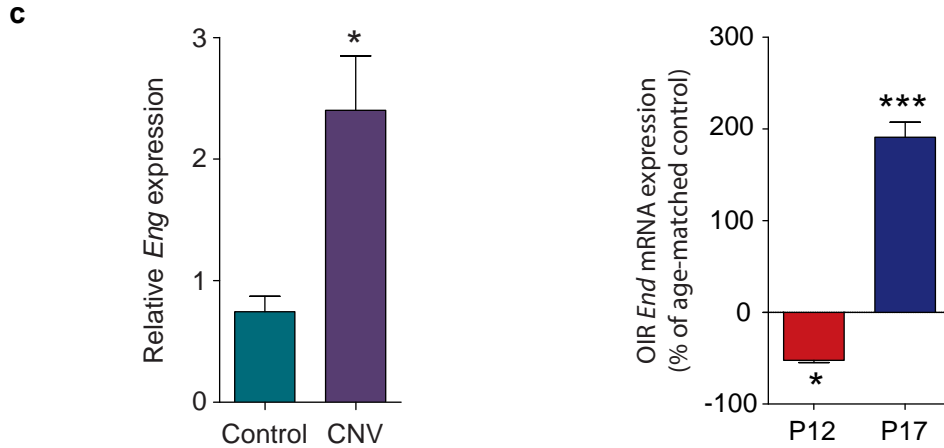

**Supplementary Figure 27. Endoglin expression is upregulated in CNV and OIR neovascularisation.** **a**, Representative immunohistological retinal sections of control (top left hand panel) and CNV lesion (top right hand panel) stained for endoglin (red), isolectin B4 (green) and nuclei (DAPI, blue). Lower panels show endoglin channel only. **b**, Representative immunohistological retinal sections of P17 control (top left hand panel) and P17 OIR lesion (top right hand panel) stained for endoglin (red), isolectin B4 (green) and nuclei (DAPI, blue). Lower panels show endoglin channel only. **c**, Histograms showing *Eng* mRNA relative to *Gapdh* mRNA in control and CNV retina (left) and relative to untreated age-matched WT control mice in OIR at P12 and P17. \* $P < 0.05$ ; \*\*\* $P < 0.001$ ;  $n = 3$  for each group.

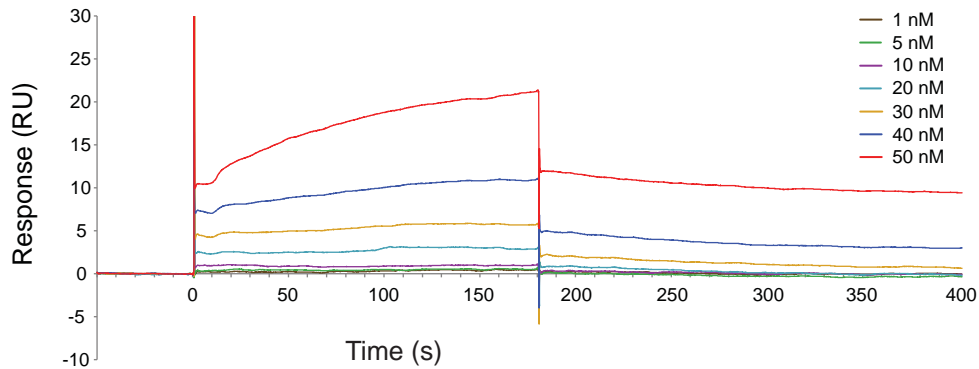

**Supplementary Figure 28. Surface plasmon resonance analysis of LRG1-ENG binding.** Real-time binding and dissociation assay was performed to determine binding kinetics of the ectodomain of ENG to LRG1 using Biacore T200. The GST tagged ectodomain domain of ENG (GST-ENG) was passed over LRG1 covalently immobilized to a CM5 sensor chip at increasing concentrations (0-50 nM). An association time of 3 minutes and a dissociation time of 5 minutes were used and the chip was regenerated between each concentration of GST-ENG. The binding curves show RU (Response Unit) as a function of time. The sensograms show a dose-dependent binding of ENG-GST to LRG1 after subtracting the background. GST on its own showed no binding to LRG1. Data provided an affinity rate constant ( $K_D$ ) of 2.9  $\mu\text{M}$ , an association rate constant ( $K_a$ ) of  $4.9 \times 10^2 \text{ M}^{-1}\text{s}^{-1}$  and a dissociation rate constant ( $K_d$ ) of  $1.4 \times 10^{-3} \text{ s}^{-1}$ .



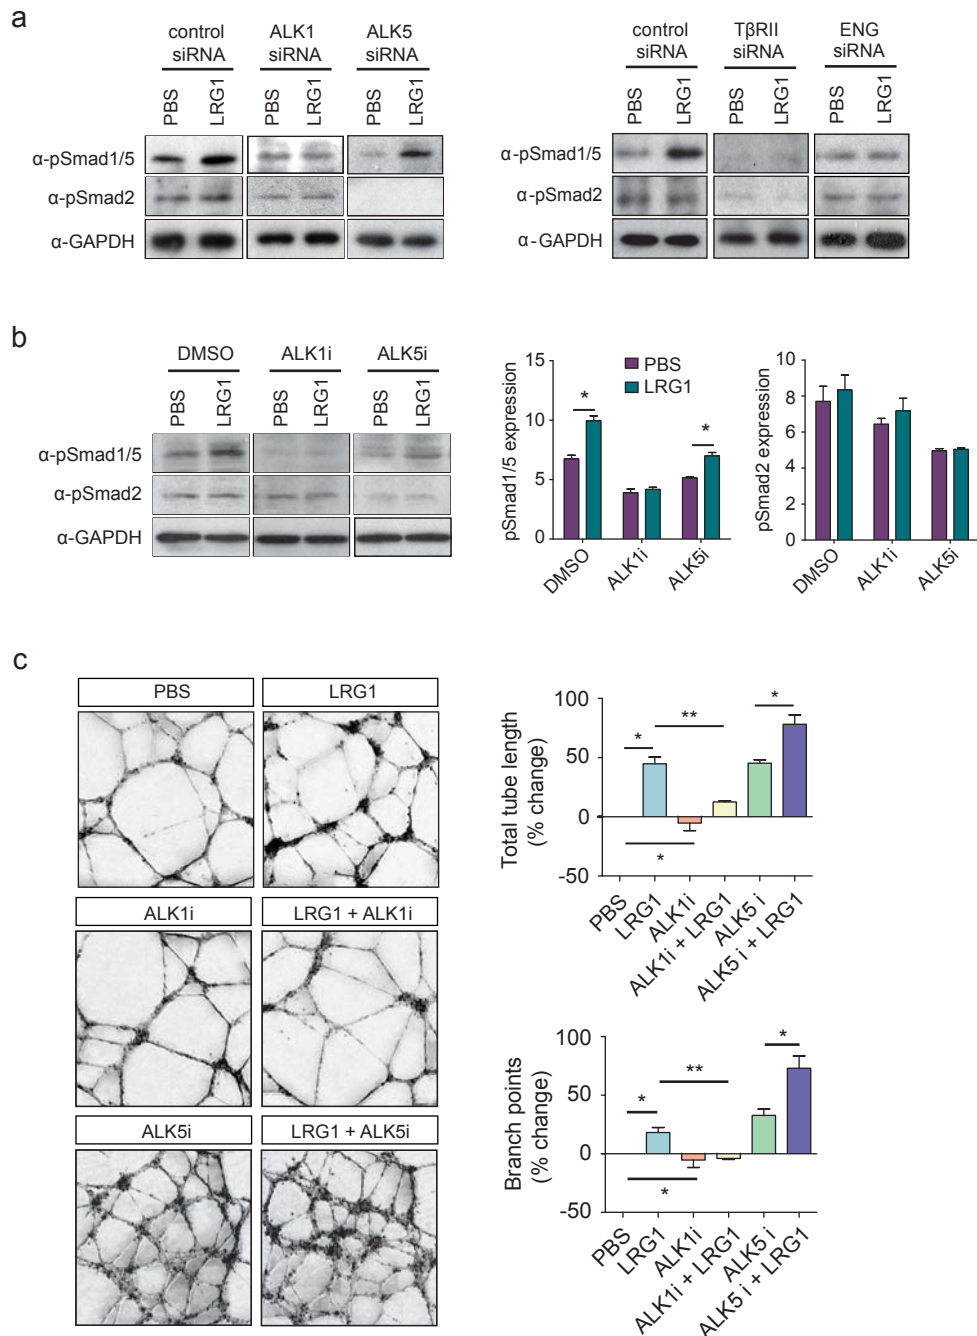

**Supplementary Figure 29. Inhibition of ALK1, but not ALK5, inhibits LRG1-mediated Smad1/5 phosphorylation and HUVEC tube and branch formation.** **a**, Western blot examples of siRNA knockdown of ALK1, ALK5, T $\beta$ RII or ENG in HUVEC on LRG1-induced Smad1/5 and Smad2 phosphorylation. Knockdown of ALK1, T $\beta$ RII and ENG, but not ALK5, results in prevention of LRG1-induced Smad1/5 phosphorylation. See Figure 5 for semi-quantification. ( $n \geq 3$ ). **b**, The ALK1 inhibitor LDN193189 (ALK1i) inhibits LRG1-induced phosphorylation of Smad1/5 but has no effect on Smad2 phosphorylation. Conversely, the ALK5 inhibitor SB43152 (ALK5i) has little effect on LRG1-induced Smad1/5 phosphorylation. Histograms show semi-quantification of Smad phosphorylation relative to GAPDH ( $n \geq 3$ ; \* $P < 0.05$ ). **c**, Representative images of the HUVEC Matrigel assay showing inhibition of LRG1-mediated tube and branch formation with the ALK1 inhibitor LDN193189 (ALK1i) but not the ALK5 inhibitor SB43152 (ALK5i). Histograms show tube length and branch formation under the different conditions. (\* $P < 0.05$ ; \*\* $P < 0.01$ ;  $n = 3$  independent assays). All values represent means  $\pm$  s.e.m.

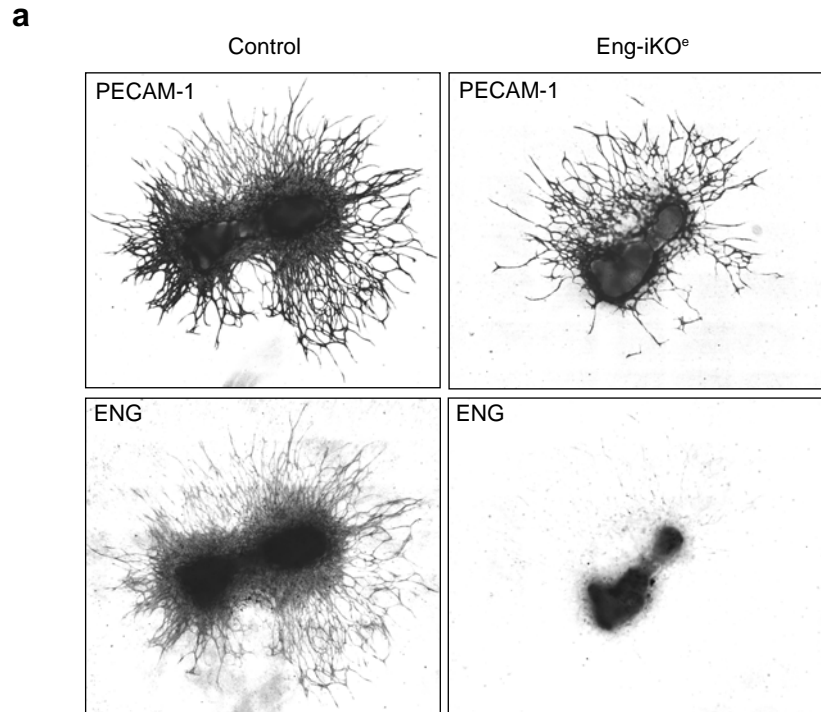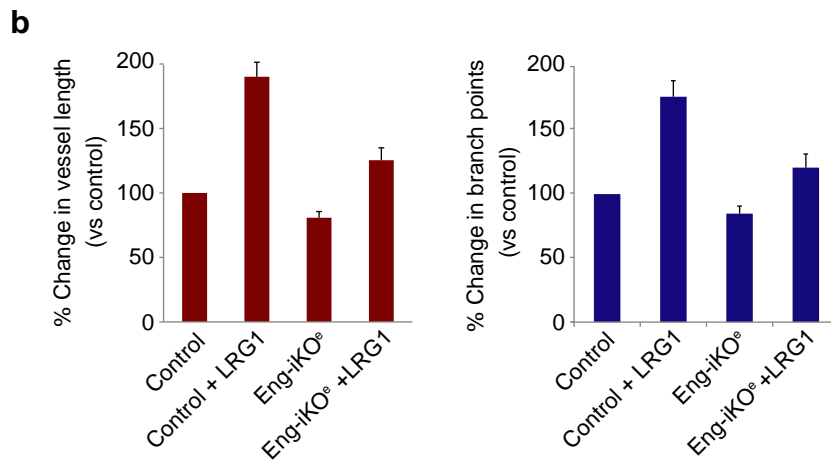

**Supplementary Figure 30. Depletion of endothelial ENG expression in metatarsal angiogenesis assay and its effect on vessel length and branching.** **a**, Representative images of PECAM-1 and ENG staining of 4OH-tamoxifen treated metatarsals from *Eng<sup>fl/fl</sup>* (control) and *Cdh5(PAC)-CreERT2;Eng<sup>fl/fl</sup>* (Eng-iKO<sup>e</sup>) mice showing ENG depletion in the latter. **b**, Percentage change in metatarsal vessel length and branching following 4OH-tamoxifen treatment of *Eng<sup>fl/fl</sup>* metatarsals (control) and *Cdh5(PAC)-CreERT2;Eng<sup>fl/fl</sup>* metatarsals (Eng-iKO<sup>e</sup>).

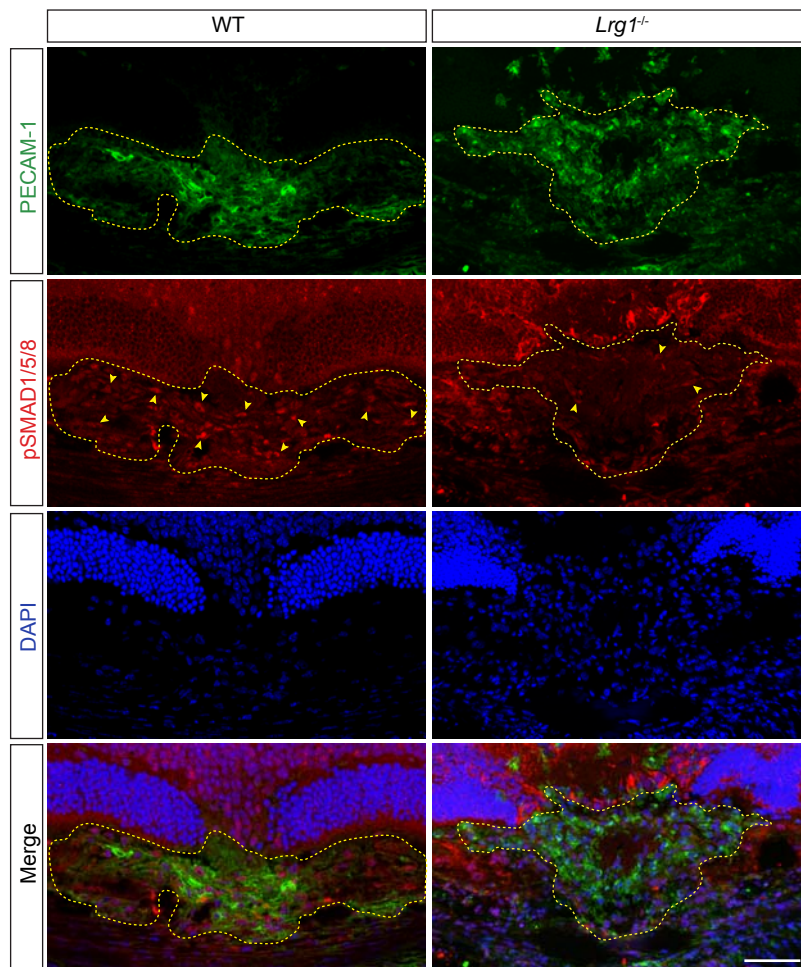

**Supplementary Figure 31. pSmad1/5/8 expression in CNV.** Representative immunohistological section of CNV lesions in wild type (WT) and *Lrg1* knockout (*Lrg1*<sup>-/-</sup>) mice stained for PECAM-1 (green) to reveal endothelial cells and phosphorylated Smad1/5/8 (red). The boundary of the CNV lesion has been demarked by a dotted yellow line. Fewer phospho-Smad1/5/8 cells were observed in the CNV lesion in the *Lrg1*<sup>-/-</sup> mice. Nuclei were stained with DAPI (blue). Scale bar 50µm.

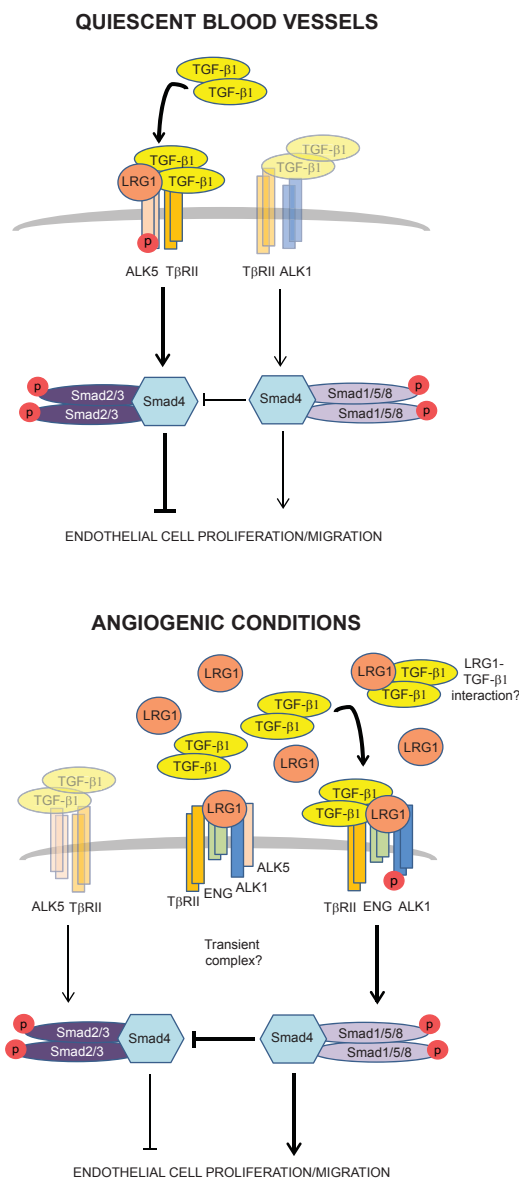

**Supplementary Figure 32. Proposed model of LRG1 mediated TGF $\beta$ 1 endothelial cell signalling.** Under resting conditions TGF $\beta$ 1 signalling in endothelial cells is predominantly via the T $\beta$ RII-ALK5-Smad2/3 pathway which maintains vascular homeostasis. During pathogenic angiogenesis there is an increase in LRG1 and ENG production. The interaction between LRG1 and TGF $\beta$ 1 may facilitate more efficient ENG/T $\beta$ RII/ALK1 receptor complex formation resulting in a switch in TGF $\beta$ 1 signalling to the ALK1-Smad1/5/8 pathway and a pro-angiogenic transcriptional response. LRG1/ENG/T $\beta$ RII/ALK1/ALK5 may form an intermediate/transient complex to allow the efficient phosphorylation of ALK1 but in the presence of TGF $\beta$ 1, LRG1/ENG/ALK1/T $\beta$ RII predominates.
